1 **Nuclear RNA binding regulates TDP-43 nuclear localization and passive nuclear export**

2

3

4 Lauren Duan<sup>1</sup>, Benjamin L. Zaepfel<sup>2</sup>, Vasilisa Aksenova<sup>3</sup>, Mary Dasso<sup>3</sup>, Jeffrey D. Rothstein<sup>1,4</sup>, Petr

5 Kalab<sup>5\*</sup>, Lindsey R. Hayes<sup>1,4\*</sup>

6

7

8 1-Brain Science Institute, Johns Hopkins University School of Medicine, Baltimore, MD 21205, USA

9 2-Biochemistry, Cellular and Molecular Biology Program, Johns Hopkins University School of Medicine,

10 Baltimore, MD 21205, USA

11 3-Division of Molecular and Cellular Biology, National Institute of Child Health and Human Development,

12 National Institutes of Health, Bethesda, MD 20892, USA

13 4-Department of Neurology, Johns Hopkins University School of Medicine, Baltimore, MD 21205, USA

14 5-Department of Chemical and Biomolecular Engineering, Whiting School of Engineering, Johns Hopkins

15 University, Baltimore, MD 21218, USA

16

17

18

19 \*Correspondence to: [petr@jhu.edu](mailto:petr@jhu.edu) and [lhayes@jhmi.edu](mailto:lhayes@jhmi.edu)

20

21

22

23

24

25

26

27

28

29 **Abstract**

30 Nuclear clearance of the DNA/RNA-binding protein TDP-43 is a pathologic hallmark of amyotrophic lateral  
31 sclerosis and frontotemporal dementia that remains unexplained. Moreover, our current understanding of  
32 TDP-43 nucleocytoplasmic shuttling does not fully explain the predominantly nuclear localization of TDP-43  
33 in healthy cells. Here, we used permeabilized and live-cell models to investigate TDP-43 nuclear export  
34 and the role of RNA in TDP-43 localization. We show that TDP-43 nuclear efflux occurs in low-ATP  
35 conditions and independent of active mRNA export, consistent with export by passive diffusion through  
36 nuclear pore channels. TDP-43 nuclear residence requires binding to GU-rich nuclear intronic pre-mRNAs,  
37 based on the induction of TDP-43 nuclear efflux by RNase and GU-rich oligomers and TDP-43 nuclear  
38 retention conferred by pre-mRNA splicing inhibitors. Mutation of TDP-43 RNA recognition motifs disrupts  
39 TDP-43 nuclear accumulation and abolishes transcriptional blockade-induced TDP-43 nuclear efflux,  
40 demonstrating strict dependence of TDP-43 nuclear localization on RNA binding. Thus, the nuclear  
41 abundance of GU-rich intronic pre-mRNAs, as dictated by the balance of transcription and pre-mRNA  
42 processing, regulates TDP-43 nuclear sequestration and availability for passive nuclear export.

43

44

45

46

47

48

49 **Keywords:** nuclear transport / RNA / splicing / TDP-43 / transcription

50

51

52

53

54

55

56

## 57 **Introduction**

58 Transactive response DNA binding protein 43 kD (TDP-43) is an essential DNA/RNA-binding protein that  
59 plays a major role in RNA processing and stability (reviewed in Prasad et al., 2019; François-Moutal et al,  
60 2019). Loss of nuclear TDP-43 expression and accumulation of cytoplasmic aggregates is a pathologic  
61 hallmark of amyotrophic lateral sclerosis (ALS) and frontotemporal dementia (FTD) (Neumann *et al*, 2006;  
62 Arai *et al*, 2006), where approximately 97% and 45% of cases show TDP-43 pathology at autopsy,  
63 respectively (reviewed in Ling et al., 2013). Substantial evidence links TDP-43 disruption to the  
64 pathogenesis of ALS and FTD, via loss of nuclear splicing regulation (Polymenidou *et al*, 2011; Tollervey *et*  
65 *al*, 2011; Ling *et al*, 2015) and the toxic effects of cytoplasmic aggregates (reviewed in Vanden Broeck et  
66 al., 2014; Prasad et al, 2019). Mutations in TDP-43 have been identified in families with inherited ALS  
67 (Kabashi *et al*, 2008; Sreedharan *et al*, 2008; Deerlin *et al*, 2008; Gitcho *et al*, 2008) and FTD (Borrioni *et*  
68 *al*, 2009; Kovacs *et al*, 2009) and cause neurodegeneration in disease models (reviewed in Buratti, 2015),  
69 supporting a role for TDP-43 disruption in the evolution of disease. Remarkably, the vast majority of ALS  
70 and FTD cases involving TDP-43 cytoplasmic mislocalization are not associated with TDP-43 mutations,  
71 indicating that diverse genetic, environmental, or age-related causes, possibly all involved in the same  
72 underlying process, drive the nuclear clearance of TDP-43 in disease. However, the factor(s) responsible  
73 for TDP-43 nuclear accumulation in healthy cells and mislocalization in ALS/FTD remain unclear.

74

75 TDP-43 is a member of the heterogenous ribonucleoprotein (hnRNP) family of RNA binding proteins  
76 (RBPs) that contains an N-terminal bipartite nuclear localization signal (NLS), two RNA recognition motifs  
77 (RRM1 and RRM2), and an intrinsically disordered C-terminal domain (reviewed in François-Moutal et al,  
78 2019). RNA crosslinking and immunoprecipitation (CLIP-seq) studies show that TDP-43 preferentially binds  
79 GU-rich RNA motifs, particularly within introns (Polymenidou *et al*, 2011; Tollervey *et al*, 2011), consistent  
80 with its essential role in regulating alternative splicing and repression of cryptic exons (Ling *et al*, 2015).  
81 Like many hnRNPs, TDP-43 continuously shuttles between the nucleus and cytoplasm (Ayala *et al*, 2008).  
82 Ran-regulated active TDP-43 nuclear import occurs via binding of its NLS to importins  $\alpha$  and  $\beta$  (Ayala *et al*,  
83 2008; Nishimura *et al*, 2010). A modest degree of passive nuclear import also likely occurs based on size  
84 and the low level of persistent nuclear entry seen in cells expressing TDP-43- $\Delta$ NLS (Ayala *et al*, 2008;

85 Winton *et al*, 2008). TDP-43 nuclear export was initially thought to occur via the exportin-1 (XPO1) receptor  
86 and a putative nuclear export signal (NES) in RRM2 (Winton *et al*, 2008). However, several groups recently  
87 showed that NES deletions do not disrupt TDP-43 export, nor does XPO1 knockdown or inhibition by  
88 selective inhibitors of nuclear export (Ederle *et al*, 2018; Pinarbasi *et al*, 2018; Archbold *et al*, 2018).  
89 Adding 54-119 kD tags to TDP-43 strongly slowed its export, as would be expected for a passive export  
90 mechanism rather than an energy-dependent, active process (Pinarbasi *et al*, 2018; Ederle *et al*, 2018).  
91 Meanwhile, transcriptional blockade promotes TDP-43 nuclear efflux (Ayala *et al*, 2008; Ederle *et al*, 2018),  
92 as does overexpression of the mRNA export receptor NXF1 (Archbold *et al*, 2018), suggesting a role for  
93 nuclear RNA in mediating TDP-43 nuclear localization and raising the possibility of TDP-43 co-export with  
94 mRNA, perhaps via the TREX (TRanscription/EXport) pathway (discussed in Ederle & Dormann, 2017).

95  
96 Here, we aimed to elucidate the mechanism of TDP-43 nuclear export and test the hypothesis that TDP-43  
97 nuclear residence depends on its preferential binding to nuclear RNAs. Consistent with this idea, we found  
98 that RNase-mediated nuclear RNA degradation in permeabilized cells markedly disrupted TDP-43 nuclear  
99 sequestration, allowing TDP-43 to diffuse from the nucleus in low-ATP conditions. Moreover, in  
100 permeabilized and live cell assays, introduction of GU-rich oligomers induced TDP-43 exit from the  
101 nucleus, likely by competitive dissociation from endogenous nuclear RNAs. Inhibition of pre-mRNA splicing  
102 caused dose-dependent TDP-43 nuclear accumulation and prevented its nuclear export upon  
103 transcriptional blockade, further supporting the notion that nuclear accumulation of TDP-43 depends on its  
104 association with pre-mRNAs. Taken together, our results indicate that binding to GU-rich intronic pre-  
105 mRNAs retains TDP-43 within nuclei and dictates its availability for passive diffusion from the nucleus.

106

## 107 **Results**

### 108 **NVP-2-induced RNA Pol II inhibition promotes rapid TDP-43 nuclear export**

109 Actinomycin D, a DNA-intercalating agent and pan-transcriptional inhibitor, has been shown to induce the  
110 nuclear efflux of a subset of nuclear RNA-binding proteins (RBPs) including hnRNPA1 (Piñol-Roma &  
111 Dreyfuss, 1992), SR proteins (Cáceres *et al*, 1998), and TDP-43 (Ayala *et al*, 2008; Ederle *et al*, 2018). To  
112 confirm that TDP-43 nuclear accumulation is sensitive to inhibition of mRNA synthesis and avoid the

113 possible pleiotropic effects of DNA intercalation, we treated HeLa cells with NVP-2, an inhibitor of CDK9-  
114 dependent RNA Polymerase II activation (Olson *et al*, 2018) and monitored TDP-43 localization by  
115 immunostaining (**Fig 1A-C**). RNA synthesis was analyzed in parallel via a brief pulse of 5-ethynyl-uridine  
116 (5-EU) prior to fixation, to facilitate 'click-chemistry' labeling of newly transcribed RNAs (Jao & Salic, 2008).  
117 Cells were imaged with an automated high-content spinning disc confocal microscope, and a translocation  
118 algorithm was used to quantify the background-corrected fluorescence intensity in the nuclear and  
119 cytoplasmic compartments (Hayes *et al*, 2020). Like actinomycin D (**Suppl fig 1A-C**), NVP-2 caused  
120 progressive, dose-dependent inhibition of RNA synthesis (**Fig 1A-B**), sparing RNA puncta within nucleoli  
121 resulting from RNA polymerase I-dependent ribosomal RNA synthesis (**Fig 1A** arrows) (Sharifi & Bierhoff,  
122 2018). In parallel, there was progressive TDP-43 nuclear efflux, as measured by a decrease in the nuclear  
123 to cytoplasmic (N/C) ratio (**Fig 1A,C**). Importantly, the drop in the TDP-43 N/C ratio induced by both NVP-2  
124 and actinomycin D corresponded to a decrease in nuclear immunofluorescence and an increase in  
125 cytoplasmic immunofluorescence (**Suppl fig 1D-E**), consistent with TDP-43 translocation from the nucleus  
126 to the cytoplasm. NVP-2 and actinomycin D treatment of mouse primary cortical neurons also induced  
127 time- and dose-dependent transcriptional inhibition and TDP-43 nuclear efflux (**suppl fig 1F-J**).

128

129 Next, we compared the effect of NVP-2 on the localization of TDP-43 versus a panel of other RBPs,  
130 including hnRNPs, RNA export proteins, members of the exon-junction complex, and splicing-associated  
131 proteins (**Fig 1D and Suppl fig 2A-B**). Cells were treated with NVP-2 for up to 6 h, fixed, and RBP  
132 localization was analyzed by immunofluorescence and automated high-content analysis. RBP responses  
133 were diverse, including rapid nuclear efflux (TDP-43, HuR), slow nuclear efflux (FUS, hnRNPA1), and no  
134 change (Matrin-3). DDX19b, an ATP-dependent RNA helicase in the mRNA export pathway that is tethered  
135 to the NPC (Napetschnig *et al*, 2009; Hodge *et al*, 2011) was unchanged, serving as an internal control for  
136 nuclear stability. hnRNPC, a resident nuclear hnRNP that does not exhibit N/C shuttling (Piñol-Roma &  
137 Dreyfuss, 1992; Ederle *et al*, 2018) showed nuclear accumulation. Interestingly, TDP-43 was among the  
138 most highly responsive RBPs to transcriptional blockade, suggesting strict dependence on nascent nuclear  
139 RNA levels.

140

141 **TDP-43 exits the nucleus by passive diffusion**

142 Recent studies showed that TDP-43 nuclear export is independent of the XPO1 nuclear export pathway  
143 (Archbold *et al*, 2018; Pinarbasi *et al*, 2018; Ederle *et al*, 2018) and may passively leave the nucleus in a  
144 size-limited manner (Pinarbasi *et al*, 2018; Ederle *et al*, 2018). In support of this, we found that the addition  
145 of a relatively small 27-kD YFP tag markedly inhibited NVP-2-induced TDP-43 nuclear efflux (**Suppl fig**  
146 **1K**). However, the mechanism of passive versus active TDP-43 export across the NPC remains to be  
147 confirmed. Permeabilized cell assays have been widely used to study nucleocytoplasmic transport,  
148 facilitating investigations of transport mechanisms in isolation from other cellular processes and permitting  
149 a broad range of experimental perturbations (Adam *et al*, 1990; Cassany & Gerace, 2009). Most  
150 commonly, digitonin is used to selectively perforate the plasma membrane (Colbeau *et al*, 1971; Adam *et*  
151 *al*, 1990), releasing the cytoplasm and leaving the nuclear membrane and NPCs intact and able to perform  
152 either passive or energy-dependent bidirectional transport (Hayes *et al*, 2020). Here, we developed an  
153 assay for the passive nuclear export of endogenous TDP-43 in digitonin-permeabilized HeLa cells (**Fig**  
154 **2A**). Post-permeabilization, cells were incubated in energy-free buffer and fixed at regular intervals to  
155 analyze the localization of TDP-43 by immunofluorescence. Nuclear envelope and NPC integrity was  
156 monitored by verifying that nuclei restrict the entry of a 70 kD fluorescent dextran (**Suppl fig 3A**), since the  
157 permeability barrier of the NPC increasingly excludes cargoes above 30-60 kD (Mohr *et al*, 2009; Timney  
158 *et al*, 2016). Using a luciferase-based reporter assay, we analyzed ATP levels following permeabilization  
159 and found that the total ATP concentration drops by ~97% immediately after digitonin treatment, compared  
160 to intact HeLa cells (**Suppl fig 3B**), confirming low ATP levels in the permeabilized cell system.

161  
162 Next, we identified conditions permissive of TDP-43 nuclear export. Upon plasma membrane  
163 permeabilization and maintenance in buffer, with no added transport receptors or ATP, we saw a  
164 progressive decrease in nuclear TDP-43 immunofluorescence, to about 50% after 1 h, in cells heated to a  
165 physiological temperature at 37°C (**Fig. 2B-C**). However, there was only minimal change in nuclear TDP-43  
166 over an identical time period when cells were permeabilized and kept at 4°C. These results indicate that,  
167 while TDP-43 can passively leave the nucleus in low-ATP conditions at 37°C, temperature-sensitive  
168 mechanism(s) hinder TDP-43 nuclear exit at 4°C beyond the expected ~linear reduction of free diffusion

169 with reduced temperature (Soh *et al*, 2010). To further test the passive nature of the observed export, we  
170 added 1,6-hexanediol, an aliphatic alcohol that reversibly disrupts the phenylalanine-glycine (FG)-  
171 permeability barrier lining the central channel of the NPC (Ribbeck & Görlich, 2002). 1,6-hexanediol caused  
172 a marked, dose-dependent acceleration of TDP-43 nuclear efflux, suggesting that nuclear pore  
173 permeability is a rate-limiting factor in TDP-43 nuclear export (**Fig. 2D–E**). Interestingly, 1,6-hexanediol  
174 accelerated TDP-43 nuclear exit not only at 37°C but also at 4°C, suggesting that the FG-repeat  
175 permeability barrier is temperature-sensitive and contributes, at least in part, to the hindrance of TDP-43  
176 passive export at 4°C. Of note, 1,6-hexanediol also reversibly inhibits TDP-43 liquid-liquid phase separation  
177 (LLPS) over the concentration range used (Gopal *et al*, 2017; Mann *et al*, 2019). Dissolution of nuclear  
178 TDP-43 phase condensates could also contribute to the acceleration of TDP-43 nuclear export if LLPS  
179 affects the availability of TDP-43 monomers for diffusion across the NPC, which remains to be investigated.  
180 Consistent with lack of involvement of XPO1 in TDP-43 export, addition of the XPO1 inhibitor leptomycin B  
181 (LMB, 100 nM) during the permeabilization, washing, and export phases did not alter TDP-43 nuclear efflux  
182 (**Suppl fig 3C**). Next, we tested the effect of adding ATP and saw no change in the rate of nuclear export  
183 at concentrations far exceeding those that support active nuclear transport in permeabilized cell systems  
184 (Cassany & Gerace, 2009; Hayes *et al*, 2020, 2021) (**Suppl fig 3D**). To confirm that the data are not  
185 confounded by TDP-43 import back into the nucleus, we tested the ability of our permeabilized cell system  
186 to support active nuclear import. Although no import receptors or Ran cycle proteins were added to the  
187 assay, residual importins do remain at NPCs upon cell permeabilization (Kapinos *et al*, 2017). Therefore,  
188 we analyzed the capacity for nuclear import of Rango, a FRET sensor and direct importin  $\beta$  cargo (Kalab *et*  
189 *al*, 2006; Hayes *et al*, 2020), and saw no import in our lysate-free conditions, with or without added ATP  
190 (**Suppl fig 3E**). Our findings are therefore unlikely to be confounded by the nuclear re-entry of TDP-43.  
191 Taken together, these data demonstrate that TDP-43 nuclear efflux in permeabilized cells is accelerated by  
192 heat and 1,6-hexanediol, but not ATP, consistent with nuclear export by passive diffusion through NPC  
193 channels.

194  
195 **TDP-43 export is independent of NXF1-mediated mRNA export**

196 The observation that TDP-43 exits the nucleus in permeabilized cells under passive conditions, and its exit  
197 is not accelerated by ATP, suggests that canonical, energy-requiring RNA export pathways are unlikely to  
198 be required for TDP-43 nuclear export. This includes the exportin-family of receptors which rely on the  
199 Ran-GTPase gradient (e.g. XPO1, XPOT, and XPO5), and the TREX bulk mRNA export pathway, which is  
200 independent of Ran but requires the activity of ATP-dependent RNA helicases, including UAP56 and  
201 DDX19b, for mRNP export complex assembly and disassembly (Okamura *et al*, 2015). In support of this,  
202 individual siRNA knockdown of XPO1, XPO5, XPOT, the NXF1 mRNA export receptor, and AlyREF, a  
203 TREX complex protein that participates in NXF1-recruitment, did not alter TDP-43 steady-state localization  
204 (Archbold *et al*, 2018; Ederle *et al*, 2018). Similarly, TDP-43 RRM mutations did not prevent nuclear export  
205 in the heterokaryon assay (Ederle *et al*, 2018). However, XPO1, XPO7, and NXF1 overexpression  
206 promoted TDP-43 cytoplasmic redistribution (Archbold *et al*, 2018). Of note, NXF1 has also been identified  
207 as a potential TDP-43 interacting protein (Freibaum *et al*, 2010).

208

209 To further exclude a role for the NXF1/TREX pathway in TDP-43 nuclear export, we utilized a DLD1 cell  
210 line in which an auxin-inducible degron (AID) tag was introduced into the endogenous NXF1 locus via  
211 CRISPR (Aksenova *et al*, 2020). TIR1 ligase, which drives ubiquitination of AID-tagged proteins upon  
212 auxin-mediated recruitment, was separately integrated at the C-terminus of the nuclear protein RCC1 via a  
213 self-cleavable P2A sequence. This enables rapid and complete degradation of the NXF1 protein within 1 h  
214 of exposure to 0.5 mM auxin (**Fig 3A**). Due to TIR1 leakage, DLD1-NXF1-AID cells showed mildly reduced  
215 NXF1 expression even prior to auxin administration (**Fig 3A** asterisk). To examine the effect of NXF1  
216 ablation on mRNA export, DLD1-wild-type and DLD1-NXF1-AID cells were treated with auxin for 0-8 h,  
217 fixed, and poly(A)-RNA N/C localization was analyzed by fluorescence in situ hybridization (FISH) (**Fig 3B-**  
218 **C**). DLD1-NXF1-AID cells showed an ~30% increase in the poly(A)-RNA N/C ratio even prior to auxin  
219 administration ( $p < 0.05$  vs. DLD1-wild-type), consistent with the reduced NXF1 expression. Auxin induced  
220 further, progressive accumulation of nuclear poly(A)-RNA to >300% of baseline by 8 h, consistent with the  
221 inhibition of mRNA export (**Fig 3B-C**). To determine the effect of NXF1 ablation on transcriptional  
222 blockade-induced TDP-43 nuclear export, cells were treated with auxin for 0-8 h, followed by a 2 h  
223 incubation  $\pm$  NVP-2 prior to fixation and TDP-43 immunostaining (**Fig 3D-E**). Interestingly, DLD1-NXF1-AID



224 cells showed an increased steady-state TDP-43 N/C ratio compared to DLD1-wild-type cells that increased  
225 with auxin treatment, presumably due to TDP-43 binding to increased nuclear poly(A)-RNA (**Fig 3D**).  
226 However, after adjusting for this increased steady-state N/C ratio, there was no delay in NVP-2-induced  
227 TDP-43 nuclear export in DLD1-NXF1-AID cells until 8h, when subtle slowing was observed (**Fig 3E**).  
228 These results suggest that inhibiting mRNA export promotes TDP-43 nuclear accumulation, but the NXF1  
229 receptor itself does not mediate TDP-43 export across the NPC.

230

### 231 **TDP-43 nuclear localization depends on binding to GU-rich RNAs**

232 Since TDP-43 is primarily nuclear, despite its ability to diffuse through the NPC, we reasoned that TDP-43  
233 localization must depend on intranuclear sequestration, perhaps binding to RNA given the rapid nuclear  
234 efflux induced by transcriptional inhibition and nuclear accumulation conferred by mRNA export blockade.  
235 To test this hypothesis, we added increasing concentrations of RNase A to permeabilized cells and  
236 monitored the effect on TDP-43 nuclear localization (**Fig 4A-C**). In contrast to untreated controls, RNase  
237 treatment caused rapid TDP-43 nuclear efflux over 30 minutes even at 4°C, suggesting that RNA indeed  
238 tethers TDP-43 within the nucleus. Interestingly, following RNase treatment, residual endogenous nuclear  
239 TDP-43 formed puncta (**Fig 4B arrows**), as reported following nuclear RNase microinjection in living cells  
240 (Maharana *et al*, 2018), and similar to the expression pattern of tagged, overexpression constructs of TDP-  
241 43 RNA binding mutants (Ayala *et al*, 2008; Elden *et al*, 2010; Wang *et al*, 2020; Yu *et al*, 2020).  
242 Furthermore, in addition to the temperature-induced changes in the NPC permeability barrier discussed  
243 above (**Fig. 2D-E**), these results suggest that temperature-sensitive dissociation from RNAs contributes to  
244 the drastically reduced passive TDP-43 nuclear exit at 4°C versus 37°C. To assess nuclear integrity, we  
245 also analyzed the effect of RNase on the nuclear localization of DDX19b (54 kD) and Nup50 (50 kD), two  
246 proteins of similar size to TDP-43 that are localized to the NPC and nucleoplasm (**Suppl fig 4A**). The  
247 nuclear intensity of both proteins was unaffected at 4°C, and modestly diminished at 37°C, but overall  
248 remarkably stable compared to the rapid nuclear efflux observed for TDP-43. The observation of the critical  
249 role of RNA in TDP-43 nuclear localization prompted us to test whether RNA degradation post-  
250 permeabilization contributes to the TDP-43 nuclear efflux we observed in our passive export assay (**Suppl**  
251 **fig 4B**). We saw no difference in the rate of TDP-43 nuclear efflux in permeabilized cells kept at 37°C for

252 30 or 60 min, with or without RNasin, suggesting that RNA degradation does not contribute to the passive  
253 export we observe. Nevertheless, RNasin was added to the transport buffer for all permeabilized cell  
254 assays as a precautionary measure.

255  
256 CLIP-seq studies demonstrate that TDP-43 preferentially binds repetitive GU-rich sequences, particularly  
257 within introns (Polymenidou *et al*, 2011; Tollervey *et al*, 2011), and the RRM domains optimally recognize a  
258 synthetic 'AUG12' (GUGUGAAUGAAU) motif (Lukavsky *et al*, 2013). To investigate the specificity of the  
259 RNA-mediated nuclear tethering of TDP-43, we added synthetic RNA oligomers designed as 'decoys'  
260 mimicking the preferred GU-rich binding sites to the permeabilized cell passive nuclear export system (**Fig**  
261 **4D-G**). Following permeabilization, increasing concentrations of (GU)<sub>8</sub>, 'AUG12', or A16 oligomers were  
262 introduced, and cells incubated at 4°C for 30 min (**Fig 4D**). Both 'AUG12' and (GU)<sub>8</sub> induced dose-  
263 dependent nuclear efflux of TDP-43, presumably by competitive dissociation of TDP-43 from endogenous  
264 nuclear RNAs, freeing TDP-43 to passively exit the nucleus. The A16 control oligomer had no effect.  
265 Incubating permeabilized cells with (GU)<sub>8</sub> at increasing temperatures (25°C and 37°C) markedly  
266 accelerated (GU)<sub>8</sub>-induced TDP-43 export (**Fig 4E**), consistent with the expected temperature-dependency  
267 of TDP-43 free diffusion, NPC permeability, and temperature-sensitive dissociation of TDP-43 from nuclear  
268 RNAs.

269  
270 Next, we evaluated the selectivity of the oligomer-induced nuclear efflux comparing different RNA motifs  
271 and RBPs in the permeabilized cell system. (GU)<sub>8</sub> induced nuclear efflux of TDP-43 but not three other  
272 RBPs, including HuR which preferentially recognizes related U-rich motifs (**Fig 4F**) (e.g. UUGGUUU,  
273 <http://rbpmap.technion.ac.il/> (Paz *et al*, 2014; Silanes *et al*, 2004; Lebedeva *et al*, 2011)). Conversely,  
274 polyU (U<sub>20</sub>) induced the nuclear efflux of HuR but not TDP-43 or other RBPs (**Fig 4G**). An oligomer based  
275 on the U1 snRNP splice site sequence (CAAAGGUAAGUUGGA (Kondo *et al*, 2015)) selectively induced the  
276 nuclear export of the U1 small nuclear ribonucleoprotein 70 kDa (U1-70K or snRNP70), with no significant effect  
277 on the localization of TDP-43, hnRNPA2/B1, or PABPN1. C16 and A16 oligomers failed to induce nuclear  
278 export of any RBPs tested, including those predicted to bind (i.e. hnRNPK and PABPN1, respectively (Choi *et*  
279 *al*, 2009; Goss & Kleiman, 2013)). Thus, at least in the permeabilized cell system, these results show that

280 nuclear localization of a subset of RBPs, including TDP-43, depends on remarkably specific and selective  
281 binding to their preferred binding motifs within nuclear RNAs.

282

283 Finally, we tested the ability of RNA oligomers to alter TDP-43 nuclear localization in live cells (**Fig 4H**).  
284 HeLa cells were transfected with increasing concentrations of (GU)<sub>6</sub> or A13 oligomers that were modified  
285 by the addition of 2'-O-methyl groups and phosphorothioate bonds to prevent degradation by cellular  
286 RNases. Cells were fixed 5 h after transfection for immunostaining and analysis. As in permeabilized cells,  
287 (GU)<sub>6</sub> but not A13 induced dose-dependent TDP-43 nuclear efflux (**Fig 4I**). Again, this was specific for  
288 TDP-43 as there was no change in the N/C ratio of HuR, FUS, or hnRNPA2/B1 (**Fig 4J**). Together, these  
289 findings confirm that in live cells, specific binding to endogenous GU-rich nuclear RNAs opposes the  
290 tendency of TDP-43 to passively leave the nucleus.

291

### 292 **Inhibition of pre-mRNA splicing promotes TDP-43 nuclear accumulation**

293 Since GU-rich nuclear RNA binding appears critical for TDP-43 nuclear retention, we hypothesized that  
294 TDP-43 nuclear accumulation relies on the abundance of GU-rich intronic sequences in newly-transcribed  
295 pre-mRNAs prior to splicing and degradation of released introns. Since inhibition of pre-mRNA splicing  
296 stalls intron excision and leads to nuclear accumulation of unspliced pre-mRNAs (Carvalho *et al*, 2017), we  
297 used two splicing inhibitors, the Ginkgo biloba tree-derived bioflavonoid isoginkgetin (IGK) (O'Brien *et al*,  
298 2008) and the bacterial macrolide pladienolide B (PLB) (Sato *et al*, 2014), to test whether nuclear intron  
299 accumulation could reduce TDP-43 nuclear efflux. PLB binds and inhibits SF3B1 in the U2 snRNP in the  
300 first step of spliceosome assembly (Kotake *et al*, 2007). The precise target of IGK has not yet been  
301 identified, but it blocks the complex A to complex B transition during spliceosome assembly, downstream of  
302 PLB (O'Brien *et al*, 2008). After a 4 h exposure, both IGK and PLB induced accumulation of introns as  
303 determined by qRT-PCR analysis with primers targeting the exon/intron junction of selected housekeeping  
304 genes, normalized to the expression of U6 snRNA, an unspliced transcript of RNA polymerase III (O'Brien  
305 *et al*, 2008) (**Suppl fig 5**). Over the same time course, there was a dose-dependent increase in the steady-  
306 state N/C ratio of TDP-43 (**Fig 5A-B, D-E**). Remarkably, when cells were incubated for 4 h with IGK or  
307 PLB, and NVP-2 was added to induce transcriptional blockade and TDP-43 nuclear efflux, both IGK and

308 PLB promoted TDP-43 nuclear retention, in a dose-dependent manner (**Fig 5C,F**). This effect was more  
309 potent for IGK than PLB, albeit at higher doses (IGK IC<sub>50</sub> = 62 μM, PLB IC<sub>50</sub> = 6 nM). Together with the  
310 observed effects of GU-rich oligomers in permeabilized and live cells, these data strongly suggest that  
311 TDP-43 nuclear localization depends on the abundance of its nuclear intronic pre-mRNA binding sites.

312

### 313 **TDP-43 RRM domains confer RNA-dependent TDP-43 nuclear localization**

314 The RNA-binding properties of the TDP-43 RRM domains have been extensively characterized (Buratti &  
315 Baralle, 2001; Lukavsky *et al*, 2013; Cohen *et al*, 2015; Flores *et al*, 2019). Although mutation or deletion of  
316 the RRM domains does not abolish TDP-43 nuclear localization (Elden *et al*, 2010; Yu *et al*, 2020), these  
317 observations arise from fluorescently tagged, high molecular weight TDP-43 constructs, which markedly  
318 inhibits TDP-43 nuclear export (**Suppl fig 1K**; Ederle *et al*, 2018; Pinarbasi *et al*, 2018). However, Ayala  
319 and colleagues previously generated TDP-43 RRM mutants with a small (~1 kD) FLAG tag and  
320 demonstrated increased cytoplasmic localization by N/C fractionation and immunoblotting (Ayala *et al*,  
321 2008). To further assess the role of the RRM domains for TDP-43 nuclear localization and export without  
322 markedly increasing its molecular weight, we generated a series of constructs expressing V5-tagged wild-  
323 type and RRM mutants of TDP-43 (**Fig 6A**), including mutations of phenylalanine residues (5F→L) and  
324 acetylation sites (2K→Q) that are critical for RNA binding (Buratti & Baralle, 2001; Cohen *et al*, 2015), and  
325 a complete RRM deletion (ΔRRM1-2). Constructs were transiently transfected into a stable HeLa cell line  
326 largely depleted of TDP-43 by CRISPR (**Suppl fig 6A-B**) (generously provided by S. Ferguson (Roczniak-  
327 Ferguson & Ferguson, 2019)) to avoid potential confounding effects of hetero-oligomerization with  
328 endogenous TDP-43. High-content image analysis showed a significant drop in the steady-state N/C ratio  
329 of all three RRM mutants, presumably exaggerated for ΔRRM1-2 due to its small size (29 kD) in  
330 comparison to the point mutants (45 kD) (**Fig 6A-B**). In addition to reduced nuclear accumulation of the  
331 RRM mutants, shuttling in response to NVP-2 was abolished. Next, we confirmed these findings with N/C  
332 fractionation and immunoblotting (**Fig 6C-D**). The immunoblotting results corroborated our image-based  
333 analyses, showing a marked reduction in the N/C ratio of TDP-43 in all three RRM mutants and no  
334 response to NVP-2. Thus, TDP-43 RRM domains are required for nuclear TDP-43 localization and RNA-  
335 regulated shuttling behavior.

336

337 Of note, coalescence of the V5-tagged RRM mutants into nuclear puncta was only rarely observed,  
338 compared to widespread puncta observed in cells transfected with YFP-tagged TDP-43-5F→L (**Suppl fig**  
339 **6C,F**) (Elden *et al*, 2010). Since 27kD-YFP contains the same three residues (F223, L221, A206) known to  
340 cause dimerization of GFP (Day & Davidson, 2009), the presumed nuclear phase separation behavior of  
341 TDP-43 RRM mutants could be exacerbated by the size or dimerization activity of GFP-derived  
342 fluorophores that can drive aberrant localization of tagged proteins in live cells (Snapp *et al*, 2003; Falcón-  
343 Pérez *et al*, 2005). Indeed, we also saw a trend toward increased nuclear puncta formation by wild type  
344 TDP-43-YFP compared to TDP-43-V5, though never to the extent of TDP-43-5FL-YFP (**Suppl fig 6F**).

345

#### 346 **Role of HSP70 chaperone activity in nuclear/cytoplasmic localization of RNA-free TDP-43**

347 The HSP70 family of chaperones was recently shown to regulate the nuclear phase separation of RNA-free  
348 TDP-43 into droplets or “anisosomes” (Yu *et al*, 2020). We wondered whether, in addition to NLS-mediated  
349 nuclear import, HSP70 activity might therefore contribute to the nuclear localization of TDP-43 RRM  
350 mutants. First, we confirmed that HSP70 inhibition strongly modifies fluorescent nuclear puncta in TDP-43  
351 CRISPR KO cells transiently transfected with TDP-43-YFP or TDP-43-5FL-YFP (**Suppl fig 6C**). TDP-43-  
352 5FL-YFP-expressing cells exhibited striking and widespread nuclear puncta, observed in 99.8% of cells vs.  
353 35% of wild-type TDP-43-YFP-expressing cells (**Suppl fig 6F**). Consistent with the report of Yu and  
354 colleagues, treatment with the HSP70 small molecule inhibitor VER 155008 (HSP70i, 50 μM) (Massey *et*  
355 *al*, 2010; Yu *et al*, 2020) induced a steady decline in the number of TDP-43-5FL-YFP puncta per nucleus  
356 (**Suppl fig 6D**), whereas no change was seen in TDP-43-YFP-expressing cells. Since the YFP tag alters  
357 nuclear localization and export (**Suppl fig 1K**), next we verified that HSP70 also regulates nuclear puncta  
358 formation using our V5-tagged RRM mutants (**Suppl fig 6E**). As shown in **Fig 6**, the V5-tagged proteins  
359 formed far fewer nuclear puncta, observed in 9% of WT-V5, 17% of 2KQ-V5, 14% of 5FL-V5, and 13% of  
360 ΔRRM1,2-V5-transfected cells (**Suppl fig 6F**). Puncta consisted of fine granules in 2KQ-V5 and 5FL-V5-  
361 expressing cells and larger spherical/shelled structures in the ΔRRM1,2-V5-transfected cells (arrows in  
362 **Suppl fig 6E**), and were more likely to be observed in higher-expressing cells across all constructs.  
363 HSP70i induced a significant increase in the number of cells with nuclear puncta in both 2KQ-V5 and

364  $\Delta$ RRM1,2-V5-transfected cells, and a similar trend in 5FL-V5-transfected cells (**Suppl fig 6E-F**),  
365 accompanied by increased mean puncta/nucleus and mean puncta area that was never observed in WT-  
366 V5-expressing cells (**Suppl fig 6H**). Thus, while HSP70i induced the simplification of pre-existing nuclear  
367 puncta in TDP43-5FL-YFP-expressing cells, it induced the formation of new and more numerous nuclear  
368 puncta in cells expressing V5-RRM mutants with a smaller, dimerization-free tag. Given reduced antibody  
369 penetration into densely-packed liquid spherical shells of larger anisosomes (Yu *et al*, 2020), it is possible  
370 that the V5 immunofluorescence (IF) under-represents the amount of V5-TDP-43 residing in nuclear  
371 puncta. However, N/C fractionation and immunoblotting (using denaturing conditions) showed a remarkably  
372 similar distribution of V5-tagged TDP-43 to the results obtained with IF (**Fig 6**), indicating that only a small  
373 fraction of the total V5-TDP-43 is enclosed in structures invisible by IF. Overall, HSP70i treatment is clearly  
374 altering the nuclear distribution of V5-tagged RRM mutants (**Suppl fig 6**), confirming potent chaperone  
375 activity in regulating the sub-nuclear localization of RNA-free TDP-43 in our model system.

376

377 Next, we analyzed the effect of HSP70i on the nuclear/cytoplasmic partitioning of TDP-43-V5 versus V5-  
378 tagged RRM mutants at steady state and following NVP-2-induced transcriptional blockade (**Suppl fig 6I**).  
379 Again, NVP-2 induced cytoplasmic shuttling of wild-type TDP-43-V5 and had no effect on the RRM  
380 mutants. Interestingly, HSP70i did not further compromise the ability of RRM-mutant TDP-43 to remain in  
381 the nucleus. Rather, HSP70i induced a modest (10-15%) increase in the TDP-43 N/C ratio of all three RRM  
382 mutants that was not observed for wild-type TDP-43-V5. Thus, HSP70-dependent nuclear chaperone  
383 activity appears to modestly favor the nuclear export of RNA-free TDP-43, by an unknown mechanism.  
384 These data suggest that HSP70 chaperones do not contribute to the nuclear accumulation of RRM-mutant  
385 TDP-43, which is most likely attributable to ongoing active and passive nuclear import.

386

## 387 **Discussion**

388 In this study, we investigated the mechanism of TDP-43 nuclear export and the regulatory role of RNA in  
389 maintaining TDP-43 nuclear localization. In permeabilized cells, TDP-43 readily exited the nucleus in low-ATP  
390 conditions, consistent with passive diffusion through NPCs. Acute depletion of NXF1 did not alter TDP-43  
391 nuclear export in live cells, further excluding active TDP-43 co-export with mRNA. Three lines of evidence

392 indicate that binding to GU-rich nuclear RNAs sequesters TDP-43 in nuclei and controls its availability for  
393 passive nuclear exit. (1) Degradation of nuclear RNAs by RNase treatment in permeabilized cells induced  
394 rapid TDP-43 nuclear efflux, demonstrating that RNA is required for TDP-43 nuclear sequestration. (2) In  
395 permeabilized and live cells, synthetic GU-rich oligomers induced nuclear TDP-43 exit, likely by competitive  
396 displacement of TDP-43 from endogenous GU-rich nuclear RNAs. Moreover, splicing inhibitors promoted  
397 TDP-43 nuclear accumulation and resistance to nuclear efflux upon transcriptional blockade, further  
398 supporting the critical role of TDP-43 binding to intronic pre-mRNAs for maintenance of nuclear  
399 localization. (3) Mutation or deletion of TDP-43 RRM domains strongly reduced TDP-43 nuclear enrichment  
400 and abolished its RNA-regulated shuttling. Taken together, these findings support a model (**Fig 7**) in which  
401 TDP-43 nuclear/cytoplasmic distribution results from a balance between active and passive TDP-43  
402 nuclear import, nuclear sequestration by binding to GU-rich intronic pre-mRNAs, and passive nuclear  
403 export. In this model, TDP-43 moves in and out of the nucleus via a reaction-diffusion-controlled  
404 mechanism (Bastiaens *et al*, 2006; Soh *et al*, 2010) whereby transient formation of high molecular weight  
405 TDP-43 complexes with nuclear pre-mRNAs ('reaction') locally sequesters TDP-43 within nuclei and  
406 hinders availability of free TDP-43 for passive diffusion through NPC channels. Since inhibition of nuclear  
407 RNA synthesis and competitive displacement with GU-RNA 'decoys' both induced net TDP-43 nuclear exit  
408 in living cells, the active import rate of TDP-43 is clearly insufficient to balance passive export resulting  
409 from loss of nuclear pre-mRNA binding sites. Either a drop in nuclear pre-mRNA binding sites or mutation  
410 of the TDP-43 RRM domains steeply increases the nuclear abundance of TDP-43 that can passively  
411 diffuse through NPCs, leading to (near) equilibration of TDP-43 between the nucleus and cytoplasm. By  
412 maintaining the nuclear abundance of GU-rich intronic pre-mRNAs, the dynamic balance of transcription  
413 and pre-mRNA processing may ultimately be the primary upstream factor determining TDP-43 nuclear  
414 localization under physiological conditions.

415

#### 416 **Transcriptional dependence of RBP nuclear enrichment**

417 Consistent with previous studies (Piñol-Roma & Dreyfuss, 1992; Cáceres *et al*, 1998; Ayala *et al*, 2008;  
418 Ederle *et al*, 2018), we observed that transcriptional blockade altered the nuclear-cytoplasmic partitioning of  
419 numerous RBPs, ranging from prominent accumulation in the cytoplasm (TDP-43 and HuR) to a nearly two-fold

420 nuclear increase (hnRNPC). Cytoplasmic-shifting RBPs included those with distinct RNA binding preferences,  
421 such as TDP-43 (Polymenidou *et al*, 2011; Tollervey *et al*, 2011; Lukavsky *et al*, 2013), HuR (Lebedeva *et*  
422 *al*, 2011), and hnRNPA1 (Bruun *et al*, 2016; Jain *et al*, 2017), as well as NXF1, which binds RNA in a  
423 sequence-independent manner (Tuck & Tollervey, 2013; Baejen *et al*, 2014). Similarly, RBPs retained or  
424 enriched in nuclei upon transcriptional inhibition included sequence-specific binders such as U2AF65 (Wu  
425 *et al*, 1999; Zorio & Blumenthal, 1999; Merendino *et al*, 1999) and the DEAD-box helicase DDX19b which  
426 has no sequence requirement (Lin *et al*, 2018). Thus, the diverse shuttling response of individual RBPs to  
427 perturbation of transcription appears to be defined by RBP-specific protein-RNA and protein-protein  
428 interactions rather than by a particular RNA motif.

429

430 Our mechanistic understanding of RNA synthesis-dependent N/C translocations of RBPs, including the factors  
431 mediating RBP nuclear export or retention, remains incomplete (Nakielny & Dreyfuss, 1999). Several RBP-  
432 specific functional domains have been identified to mediate nucleocytoplasmic shuttling, including the HuR  
433 nucleocytoplasmic shuttling (HNS) domain (Fan & Steitz, 1998), the K nuclear shuttling (KNS) motif of  
434 hnRNPK (Michael *et al*, 1997), the M9 signal required for transportin-mediated nuclear import and  
435 transcriptional blockade-induced export of hnRNPA1 (Michael *et al*, 1995), the nuclear retention signal of  
436 hnRNPC (Nakielny & Dreyfuss, 1996), and the SR domain of SF2 (SRSF1), which confers actinomycin D-  
437 dependent shuttling to other proteins (Cáceres *et al*, 1998). Here, we demonstrate that the TDP-43 RRM1-  
438 RRM2 domains mediate its transcriptional blockade-induced nuclear efflux and act as a nuclear retention  
439 domain via binding nuclear RNAs. Interestingly, a recent study showed that the depletion of cytoplasmic RNAs,  
440 via activation of the primarily cytoplasmic Xrn1 exonuclease-dependent mRNA decay, induced nuclear  
441 translocation of many RBPs, including the cytoplasmic poly(A) binding protein PABPC (Gilbertson *et al*, 2018).  
442 In a spatial inverse to our current model of TDP-43 shuttling, the findings of Gilbertson and colleagues suggest  
443 that the cytoplasmic abundance of poly(A)-RNAs may be responsible for maintaining cytoplasmic PABPC  
444 localization. Nucleocytoplasmic gradients of the preferred RNA binding motifs may therefore represent a  
445 broadly-applicable model for regulating RBP localization, which warrants further investigation.

446

447 **Passive diffusion of TDP-43 across the NPC**



448 The FG permeability barrier of the NPC does not have a strict size cutoff; rather, diffusion of cargoes through  
449 the NPC is increasingly restricted over the 30-60 kD range (Mohr *et al*, 2009; Timney *et al*, 2016). Thus, 43 kD  
450 TDP-43 monomers are predicted to diffuse across the NPC with moderate efficiency. Indeed, we observed  
451 TDP-43 nuclear efflux in permeabilized cells in low-ATP conditions, that was accelerated by NPC  
452 permeabilization as expected for passive diffusion from the nucleus. These data corroborate predictions from  
453 live-cell assays showing marked size-restriction of TDP-43 nuclear export, including slowed TDP-43-tdTomato  
454 (+54 kD) export in the heterokaryon assay (Pinarbasi *et al*, 2018), lack of TDP-43-GCR<sub>2</sub>-EGFP<sub>2</sub> (+119 kD)  
455 cytoplasmic recovery in a dexamethasone-induced shuttling assay (Ederle *et al*, 2018), and failure of TDP-43-  
456 YFP (+27 kD) nuclear efflux following transcriptional blockade (**Suppl fig 1K**). Delay in active nuclear import  
457 has been demonstrated for very large cargoes (Paci *et al*, 2020), and the rate of active mRNP export is  
458 modestly size-dependent (Grünwald *et al*, 2011). However, the exquisite size-limitation of TDP-43 nuclear  
459 export in live-cell assays is most consistent with passive diffusion from the nucleus, as our permeabilized cell  
460 passive export assay confirms.

461

462 In addition to size, cargo surface properties also critically dictate NPC passage, including hydrophobic residues  
463 which augment NPC transport (Frey *et al*, 2018). Besides the glycine-rich C-terminal IDR, hydrophobic patches  
464 are present throughout the TDP-43 sequence (<https://web.expasy.org/protscale/> (Gasteiger *et al*, 2005)),  
465 including within the N-terminal domain, RRM1, and RRM2, but their roles in NPC passage are not known. A  
466 recent study showed that intrinsically disordered proteins (up to ~63kDa) can passively transit through NPC  
467 channels (Junod *et al*, 2020), suggesting that the disordered state of the TDP-43 C-terminal IDR could  
468 potentially contribute to its passive nuclear exit. The potential role of TDP-43 hydrophobic and disordered  
469 regions for passive translocation through NPC channels remains to be examined.

470

### 471 **Nuclear–cytoplasmic GU-rich RNA gradients and TDP-43 shuttling**

472 CLIP-seq studies have shown that TDP-43 preferably binds to long stretches of GU-rich intronic pre-mRNA  
473 sequences present in about 30% of genes (Polymenidou *et al*, 2011; Tollervey *et al*, 2011). Introns are in  
474 average much longer than exons in the predicted pre-mRNAs of human genes (7.5 kB vs 320 B (Lee & Rio,  
475 2015)), and some are retained in exported mRNAs due to alternative splicing or incomplete debranching, and

476 detectable in the cytoplasm as stable intron lariats (Talhouarne & Gall, 2018; Saini *et al*, 2019). However, a  
477 substantial proportion of nuclear intronic sequences, whether still contained in pre-mRNAs or excised, are likely  
478 short-lived, due to the tight coupling of transcription with pre-mRNA splicing, pre-mRNA quality surveillance, and  
479 rapid degradation via the nuclear exosome (Lee & Rio, 2015; Kilchert *et al*, 2016; Bresson & Tollervey,  
480 2018). Active transcription could then potentially give rise to the N/C concentration gradient of the preferred  
481 TDP-43 binding sites in intronic GU-rich RNAs. The evident nuclear accumulation of newly-synthesized 5-EU-  
482 labeled RNAs in HeLa and neurons (**Fig 1A** and **Suppl fig 1A,F**) is indeed consistent with the existence of a  
483 steep N/C gradient of U-rich nascent RNAs. Recent rapid advances in CLIP-seq and related methods (Wheeler  
484 *et al*, 2018; Hafner *et al*, 2021) have yielded detailed insights into the RNA-RBP interactions and their  
485 dynamics (Nostrand *et al*, 2020). Despite this progress, currently available computational methods are not well  
486 suited for global quantification of particular sequence motifs (such as GU repeats) across all RNA sequences,  
487 although quantitative comparisons within narrowly defined sequence windows are feasible (Boswell *et al*,  
488 2017). Thus, direct quantification of the putative N/C gradient of TDP-43 RNA binding sites might require  
489 development of new methodological approaches.

490

### 491 **Biophysical regulation of TDP-43—RNA binding**

492 We observed a drastic reduction in TDP-43 passive nuclear exit from permeabilized cell nuclei at 4°C (**Fig 2B-**  
493 **C**), far beyond the approximately two-fold decrease in the passive nuclear import of ERK2-GFP at 4°C in a  
494 similar permeabilized cell system (Whitehurst *et al*, 2002). Thus, temperature-dependence of free diffusion  
495 alone is unlikely to fully account for the slowing we observed at 4°C. The ability of 1,6-hexanediol to elicit TDP-  
496 43 efflux at 4°C (**Fig 2D-E**) suggests that the FG-repeat permeability barrier is temperature-sensitive and likely  
497 contributes to the hindrance of TDP-43 passive export at 4°C. Interestingly, TDP-43 nuclear efflux induced by  
498 RNA degradation or GU-rich oligomers was also delayed at 4°C, suggesting temperature sensitivity of TDP-43  
499 – RNA binding, which remains to be experimentally verified. RNA-protein interactions generally involve dynamic  
500 rearrangements of both binding partners and their stabilization in the complex (Corley *et al*, 2020), suggesting  
501 that increased mobility of the complex at a higher temperature may promote TDP-43—RNA dissociation.  
502 Consistent with this explanation, molecular dynamics and structural studies indicate that van der Waals forces  
503 support the majority of the TDP-43—RNA interaction (Sun *et al*, 2021) as well as the intramolecular

504 interactions of RRM1—RRM2, which have a significant influence on TDP-43—RNA affinity (Lukavsky *et al*,  
505 2013). Since van der Waals forces steeply decline with distance of the interacting atoms, a temperature-  
506 dependent increase in molecular fluctuation thus could stochastically promote TDP-43 unbinding from nuclear  
507 RNAs at 37°C.

508

509 The repertoire of TDP-43 GU-rich RNA binding partners identified by CLIP-seq is structurally diverse  
510 (Polymenidou *et al*, 2011; Tollervey *et al*, 2011), and *in vitro* measurements show that TDP-43 binds to  
511 different GU-rich RNAs with widely ranging dissociation constants (~3-3000 nM), with the affinity increasing with  
512 the number of perfect GU repeats (Bhardwaj *et al*, 2013). The existence of multiple low affinity-binding sites  
513 might have a physiological role in TDP-43 auto-regulation (Avendaño-Vázquez *et al*, 2012; Bhardwaj *et al*,  
514 2013) and helps to explain the ability of short GU-rich oligomers, which bind TDP-43 *in vitro* with low-nM affinity  
515 (Bhardwaj *et al*, 2013; French *et al*, 2019), to displace TDP-43 from endogenous RNAs (**Fig 4D,I**). Although  
516 RNase caused a near-complete evacuation of TDP-43 from nuclei in permeabilized cells (**Fig 4B-C**), TDP-43  
517 efflux induced by transcriptional blockade (**Fig 1C, Suppl Fig 1C,H,J**) and GU-rich ‘decoy’ oligomers (**Fig 4I**)  
518 showed a time- and dose-dependent plateau in living cells. In addition to ongoing active nuclear import, the  
519 existence of an ‘export-resistant’ nuclear pool of TDP-43 may result from its binding to other nuclear RNAs such  
520 as long non-coding RNAs, which constitute a subset of TDP-43 RNA binding partners (Polymenidou *et al*,  
521 2011; Tollervey *et al*, 2011) and have been shown to play a role in TDP-43 nuclear LLPS (NEAT 1) (Wang *et al*  
522 *et al*, 2020) and nuclear localization (Malat1) (Nguyen *et al*, 2019). ‘Export-resistant’ TDP-43 may also represent  
523 TDP-43 bound to chromatin or nuclear matrix constituents, as supported by TDP-43 chromatin fractionation  
524 data (Ayala *et al*, 2008). Since TDP-43 preferentially binds ssDNA (Buratti & Baralle, 2001), direct binding to  
525 genomic DNA is uncertain, but TDP-43 could be indirectly associated with chromatin via protein-protein  
526 interactions with histones or other chromatin-associated proteins (Freibaum *et al*, 2010). Indeed, TDP-43 was  
527 identified among numerous chromatin-associated RBPs in a recent crosslinking/co-precipitation analysis  
528 (Rafiee *et al*, 2021). Nevertheless, a large fraction of endogenous, wild-type TDP-43 in our model systems  
529 exhibited nuclear RNA concentration-dependent shuttling.

530

531 **Other physiologic and pathologic factors that may regulate TDP-43 shuttling**

532 Together with NLS-mediated active nuclear import, our results indicate that TDP-43 RRM1,2-dependent pre-  
533 mRNA-binding plays a critical role in establishing the steep concentration gradient of TDP-43 across the nuclear  
534 envelope (**Fig 6**). Multiple additional physiologic and pathologic processes likely function in parallel to modulate  
535 TDP-43 steady-state localization and availability for active or passive nucleocytoplasmic transport. These  
536 include oligomerization (Mompeán *et al*, 2017; Afroz *et al*, 2017; French *et al*, 2019), LLPS (Molliex *et al*,  
537 2015; Conicella *et al*, 2016; Zacco *et al*, 2018; Mann *et al*, 2019; Conicella *et al*, 2020; Carter *et al*, 2021),  
538 alternative splicing to truncated isoforms (Weskamp *et al*, 2020), post-translational modifications, such as  
539 phosphorylation, ubiquitination, SUMOylation, acetylation, and C-terminal cleavage (Prasad *et al*, 2019;  
540 François-Moutal *et al*, 2019), and pathologic aggregation in disease (Arai *et al*, 2006; Neumann *et al*, 2006).  
541 Aberrant maturation of TDP-43 LLPS condensates by seeding (Gasset-Rosa *et al*, 2019) or optogenetic  
542 clustering (Mann *et al*, 2019) has been shown to progressively divert the soluble TDP-43 pool into insoluble,  
543 high molecular weight cytoplasmic aggregates that seemingly become irreversibly unavailable for nuclear  
544 transport. Interestingly, GU-RNA oligomers attenuate recombinant TDP-43 aggregation *in vitro* (French *et al*,  
545 2019) and optogenetically-induced cytoplasmic TDP-43 aggregation in living cells (Mann *et al*, 2019),  
546 consistent with the notion that access to GU-rich RNAs promotes TDP-43 availability for nucleocytoplasmic  
547 shuttling.

548

#### 549 **Disruption of RNA metabolism in ALS/FTD**

550 The observation that GU-rich nuclear pre-mRNAs critically regulate TDP-43 nuclear localization raises the  
551 possibility that disruption of nuclear RNA metabolism could contribute to TDP-43 nuclear clearance in ALS/FTD.  
552 Indeed, disruption of RNA processing and RNA-based therapy development are of growing interest in the  
553 neurodegenerative disease field (Nussbacher *et al*, 2019; Butti & Patten, 2019; Zaepfel & Rothstein, 2021).  
554 The status of the GU-rich RNA gradient in TDP-43-mislocalized cells in ALS/FTD is unknown, and few studies  
555 to date have examined factors predicted to alter the availability of nuclear GU-rich pre-mRNA binding sites,  
556 such as transcription and splicing dynamics or nuclear RNA turnover. However, analysis of genome-wide RNA  
557 stability in fibroblasts and induced pluripotent stem cells using metabolic labeling (Bru-seq) demonstrated RNA  
558 destabilization in ALS patient-derived cells versus controls (Tank *et al*, 2018). Spliceosomal machinery has  
559 also appeared as a common denominator in both knockout and interactome analyses of RBPs implicated in

560 familial ALS/FTD (Chi *et al*, 2018a, 2018b). Further investigation of these factors is warranted as well as N/C  
561 transcriptome compartmentalization, which has shown changes in nuclear RNA retention in the context of  
562 neuropsychiatric disorders (Price *et al*, 2019), and may provide clues as to perturbation of RNA processing in  
563 ALS/FTD. Based on the similar behavior of TDP-43 in HeLa cells and neurons following transcriptional inhibition  
564 (**Fig 1 and Suppl fig 1**), it appears likely that the RNA-based regulation of TDP-43 nuclear localization is  
565 conserved across somatic and neuronal cells. Moreover, it is tempting to speculate that neuron-specific  
566 perturbations in RNA processing/metabolism (Mauger *et al*, 2016; Hermey *et al*, 2017; Jaffrey & Wilkinson,  
567 2018; Furlanis *et al*, 2019; Saini *et al.*, 2019; Tyssowski & Gray, 2019; Ling *et al*, 2020) may contribute to  
568 cell-specific TDP-43 mislocalization in disease.

569

## 570 Conclusion

571 In summary, nuclear GU-RNA binding and abundance regulate TDP-43 steady-state nuclear localization by  
572 dictating availability for passive nuclear export. Further investigation is needed to determine if disruption of RNA  
573 metabolism or localization contribute to TDP-43 nuclear clearance in ALS/FTD. Our findings also suggest that  
574 RNA-based approaches may be a useful strategy to restore TDP-43 nuclear localization and attenuate TDP-43  
575 nuclear loss of function defects in disease.

576

## 577 Methods

| Reagent/Resource                       | Reference or Source                          | Identifier or Catalog No. |
|----------------------------------------|----------------------------------------------|---------------------------|
| <b>Experimental Models</b>             |                                              |                           |
| HeLa cells (human)                     | ATCC and (Kalab <i>et al</i> , 2006)         | HeLa clone 61             |
| TDP-43 CRISPR KO HeLa cells (human)    | (Roczniak-Ferguson & Ferguson, 2019)         |                           |
| HEK293T cells (human)                  | ATCC                                         |                           |
| DLD1-wildtype cells (human)            | ATCC and (Aksenova <i>et al</i> , 2020)      |                           |
| DLD1-NXF1-AID cells (human)            | ATCC and (Aksenova <i>et al</i> , 2020)      |                           |
| Mouse primary cortical neurons         | E16 timed pregnant mice (Jackson laboratory) |                           |
|                                        |                                              |                           |
| <b>Recombinant DNA</b>                 |                                              |                           |
| V5-tagged TDP-43 expression constructs | This study                                   | <b>See Table 1</b>        |
| pcDNA3.2 TDP-43 YFP                    | (Elden <i>et al</i> , 2010) via Addgene      | Cat #84911                |
| pcDNA3.2 TDP-43 5F-L YFP               | (Elden <i>et al</i> , 2010) via Addgene      | Cat #84914                |

|                                                             |                                |                 |
|-------------------------------------------------------------|--------------------------------|-----------------|
| pRSET Rango-2/ $\alpha$ 1+linkers                           | (Hayes <i>et al</i> , 2020)    | pK44            |
| Importin $\beta$ (71-876)                                   | (Drutovic <i>et al</i> , 2020) | pKW488          |
|                                                             |                                |                 |
| <b>Antibodies</b>                                           |                                |                 |
| Mouse anti-TDP43 monoclonal (WB: 1:2000, IF: 1:2000-1:5000) | Abcam [3H8]                    | Cat# ab104223   |
| Rabbit anti-hnRNP A1 polyclonal (IF: 1:2000)                | Proteintech                    | Cat# 11176-1-AP |
| Mouse anti-hnRNP A2/B1 monoclonal (IF: 1:50)                | Santa Cruz Biotechnology       | Cat# sc-53531   |
| Rabbit anti-hnRNP A2/B1 polyclonal (IF: 1:1000)             | Invitrogen                     | Cat#PA5-30061   |
| Mouse anti-hnRNP C1/C2 monoclonal (IF: 1:100)               | Santa Cruz Biotechnology       | Cat# sc-32308   |
| Rabbit anti-hnRNP F polyclonal (IF 1:500)                   | Thermo Scientific              | Cat# PA5-22341  |
| Mouse anti-hnRNP K monoclonal (IF: 1:100)                   | Santa Cruz Biotechnology       | Cat# sc-28380   |
| Rabbit anti-hnRNP M polyclonal (IF: 1:500)                  | Thermo Scientific              | Cat# PA5-30247  |
| Rabbit anti-FUS polyclonal (IF: 1:3000)                     | Bethyl                         | Cat# A300-302A  |
| Rabbit anti-PABPN1 monoclonal (IF: 1:1000)                  | Invitrogen                     | Cat# MA5-32621  |
| Rabbit anti-PCBP1 polyclonal (IF: 1:500)                    | Invitrogen                     | Cat# PA5-65369  |
| Rabbit anti-Matrin 3 monoclonal (IF 1:1000)                 | Abcam                          | Cat# ab151714   |
| Mouse anti-AlyREF monoclonal (IF: 1:500)                    | Santa Cruz Biotechnology       | Cat# sc-32311   |
| Rabbit anti-Nup50 monoclonal (IF: 1:250)                    | Abcam                          | Cat# ab137092   |
| Rabbit anti-DDX19b polyclonal (IF: 1:3000)                  | Abcam                          | Cat# ab151478   |
| Rabbit anti-NXF1 monoclonal (IF 1:2000, WB: 1:2000)         | Abcam                          | Cat# ab129160   |
| Rabbit anti-ELAVL1/HuR monoclonal (IF: 1:100)               | Cell Signaling Technology      | Cat# 12582      |
| Mouse anti-DEK monoclonal (IF: 1:100)                       | Santa Cruz Biotechnology       | Cat# sc-136222  |
| Mouse anti-Y14 monoclonal (IF 1:100)                        | Santa Cruz Biotechnology       | Cat# sc-32312   |
| Mouse anti-sc35 monoclonal (IF 1:2000)                      | Sigma-Aldrich                  | Cat# S4045      |
| Mouse anti-U1-70K monoclonal                                | Sigma-Aldrich                  | Cat# 05-1588    |

|                                                                    |                                 |                              |
|--------------------------------------------------------------------|---------------------------------|------------------------------|
| (IF 1:500)                                                         |                                 |                              |
| Mouse anti-U2AF65<br>(IF 1:100)                                    | Santa Cruz Biotechnology        | Cat# 53942                   |
| Mouse anti-UAP56 (BAT1)<br>monoclonal (IF 1:50)                    | Santa Cruz Biotechnology        | Cat# sc-271395               |
| Rabbit anti-DHX15 polyclonal<br>(IF 1:200)                         | Thermo Fisher                   | Cat# PA5-561413              |
| Rabbit anti-FMRP polyclonal<br>(IF 1:500)                          | Abcam                           | Cat# ab17722                 |
| Rabbit anti-GAPDH monoclonal<br>(WB: 1:3000)                       | Cell Signaling Technology       | Cat# 5174                    |
| Rabbit anti-V5 monoclonal (WB:<br>1:1000, IF 1:2000)               | Cell Signaling Technology       | Cat# 13202                   |
| Rabbit anti-Lamin B1 polyclonal<br>(WB: 1:1000)                    | Abcam                           | Cat# ab16048                 |
| Goat anti-mouse IgG AF488<br>polyclonal (IF: 1:1000)               | Invitrogen                      | Cat# A32723                  |
| Goat anti-rabbit IgG AF488<br>polyclonal (IF: 1:1000)              | Invitrogen                      | Cat# A32731                  |
| Goat anti-mouse IgG AF647<br>polyclonal (IF: 1:1000)               | Invitrogen                      | Cat# A32728                  |
| Horse anti-mouse IgG HRP-<br>conjugated polyclonal (WB:<br>1:5000) | Cell Signaling Technology       | Cat# 7076S                   |
| Goat anti-rabbit IgG HRP-<br>conjugated polyclonal (WB:<br>1:5000) | Cell Signaling Technology       | Cat# 7074S                   |
|                                                                    |                                 |                              |
| <b>Oligonucleotides and other<br/>sequence-based reagents</b>      |                                 |                              |
| RNA oligonucleotides                                               | This study                      | <b>See Table 2</b>           |
| Cy3-oligo-dT(45)                                                   | IDT                             |                              |
| TDP-43 Taqman assay                                                | ThermoFisher                    | Cat# Hs00429203_gH           |
| GAPDH Taqman assay                                                 | ThermoFisher                    | Cat# Hs02786624_g1           |
|                                                                    |                                 |                              |
| qPCR primers:                                                      |                                 |                              |
| $\beta$ -tubulin intron 2 forward                                  | CTATAAACCTTCCCTTCTGCCA<br>G     | (Kaida <i>et al</i> , 2007)  |
| $\beta$ -tubulin exon 4 reverse                                    | CAGGGTATTCTTCTCGCATCTT<br>GCTG  | (Kaida <i>et al</i> , 2007)  |
| Actin exon 3 forward                                               | GGTGGGCATGGGTCAGAAGGA<br>T      | (Kaida <i>et al</i> , 2007)  |
| Actin intron 4 reverse                                             | GGAAATGAGGGCAGGACTTAG<br>CTT    | (Kaida <i>et al</i> , 2007)  |
| DNAJB1 intron 2 forward                                            | GGCCTGATGGGTCTTATCTATG<br>G     | (Kotake <i>et al</i> , 2007) |
| DNAJB1 exon 3 reverse                                              | AATGAGGTCCCCACGTTTCTCG<br>GGTGT | (Kotake <i>et al</i> , 2007) |

|                                                                 |                              |                               |
|-----------------------------------------------------------------|------------------------------|-------------------------------|
| U6 forward                                                      | CGCTTCGGCAGCACATATAC         | (O'Brien <i>et al</i> , 2008) |
| U6 reverse                                                      | GAATTTGCGTGTTCATCCTTG        | (O'Brien <i>et al</i> , 2008) |
|                                                                 |                              |                               |
| <b>Chemicals, Enzymes and other reagents</b>                    |                              |                               |
| Recombinant RNasin<br>Ribonuclease Inhibitor                    | Promega                      | Cat# N2515                    |
| RNase A                                                         | ThermoFisher                 | Cat# EN0531                   |
| Digitonin, high purity                                          | Calbiochem                   | Cat# 300410                   |
| Halt protease inhibitor cocktail                                | ThermoFisher                 | Cat# 78439                    |
| Dextran, Texas Red, 70,000 MW,<br>Lysine Fixable                | Invitrogen                   | Cat# D1864                    |
| 1,6-Hexanediol                                                  | Sigma-Aldrich                | Cat# 240117                   |
| ATP disodium salt hydrate                                       | Sigma-Aldrich                | Cat# A6419                    |
| Paraformaldehyde 32% aqueous<br>solution                        | Electron Microscopy Sciences | Cat# 15714S                   |
| HEPES buffer solution                                           | Sigma-Aldrich                | Cat# 83264                    |
| 4X Laemmli Sample Buffer                                        | Bio-Rad                      | Cat# 1610747                  |
| Blotting Grade Blocker Non-Fat<br>Dry Milk                      | Bio-Rad                      | Cat# 1706404XTU               |
| 10x Tris/Glycine/SDS Buffer                                     | Bio-Rad                      | Cat# 1610732                  |
| Phosphate Buffered Saline                                       | Gibco                        | Cat# 10010023                 |
| UltraPure Glycerol                                              | Invitrogen                   | Cat# 15514011                 |
| Hoechst 33342                                                   | Thermo Fisher                | Cat# H1399                    |
| Actinomycin D                                                   | Sigma-Aldrich                | Cat# A9415                    |
| NVP-2                                                           | Tocris Bioscience            | Cat# 6535                     |
| 5-ethynyl-uridine                                               | Click Chemistry Tools        | Cat# 1261                     |
| Click-&-Go Cell Reaction Buffer kit                             | Click Chemistry Tools        | Cat# 1263                     |
| Isoginkgetin                                                    | Millipore Sigma              | Cat# 416154                   |
| Pladienolide B                                                  | Cayman Chemicals             | Cat# 13568                    |
| Auxin (3-indoleacetic acid)                                     | Sigma-Aldrich                | Cat# I2886                    |
| VER 155008 (HSP70i)                                             | ApexBio                      | Cat# A4387                    |
| Leptomycin B                                                    | Cayman Chemicals             | Cat# 10004976                 |
| Glass-bottom 96-well plates                                     | CellVis                      | Cat# P96-1.5H-N               |
| 4-20% Criterion TGX Stain-Free<br>Protein Gel, 26 well, 15 µl   | Bio-Rad                      | Cat# 5678095                  |
| Trans-Blot Turbo RTA Midi 0.2 µm<br>Nitrocellulose Transfer Kit | Bio-Rad                      | Cat# 1704271                  |
| SuperSignal West Pico PLUS<br>Chemiluminescent Substrate        | ThermoFisher                 | Cat# 34580                    |
| Lipofectamine RNAiMAX<br>Transfection Reagent                   | Invitrogen                   | Cat# 13778030                 |
| NE-PER Nuclear and Cytoplasmic<br>Extraction Reagents           | ThermoFisher                 | Cat# 78833                    |



|                                              |                    |               |
|----------------------------------------------|--------------------|---------------|
| Opti-MEM I Reduced Serum Medium              | Gibco/ThermoFisher | Cat# 31985088 |
| DMEM, high glucose, pyruvate                 | Gibco/ThermoFisher | Cat# 11995073 |
| Penicillin-streptomycin 100X                 | Gibco/ThermoFisher | Cat# 15140122 |
| Matrigel                                     | Corning            | Cat# 354230   |
| Normal Goat Serum                            | Vector Labs        | Cat# S-1000   |
| TRIzol                                       | Invitrogen         | Cat# 15596018 |
| High-Capacity cDNA Reverse Transcription Kit | ThermoFisher       | Cat# 4368814  |
| PowerSYBR Green PCR Master Mix               | ThermoFisher       | Cat# 4367659  |
| CellTiter-Glo 2.0 assay kit                  | Promega            | Cat# G9242    |
|                                              |                    |               |
| <b>Software</b>                              |                    |               |
| MetaXpress (v6.1.0.2071)                     | Molecular Devices  |               |
| ImageQuant TL (v7.0)                         | GE Healthcare      |               |
| Prism (v9.2.0)                               | Graphpad           |               |
| FIJI/Image J (v2.1.0/1.53c)                  | NIH                |               |
| Photoshop 2021 (v22.4.3)                     | Adobe              |               |
|                                              |                    |               |
| <b>Other</b>                                 |                    |               |
| ImageXpress Micro Confocal System            | Molecular Devices  |               |
| Trans-Blot Turbo Transfer System             | Bio-Rad            |               |
| Nano-drop 1000                               | Thermo Scientific  |               |
| QuantStudio 3 Real-Time PCR System           | ThermoFisher       |               |
| ImageQuant LAS 4000 System                   | GE Healthcare      |               |
| Spectramax M3 plate reader                   | Molecular Devices  |               |
|                                              |                    |               |

578

579 **Immortalized cell culture**

580 A single cell-derived clone of HeLa cells (ATCC) was maintained in OptiMEM (Gibco/ThermoFisher) with  
581 4% FBS and penicillin-streptomycin. HEK293T cells (ATCC) and a monoclonal TDP-43 CRISPR-depleted  
582 HeLa cell line (a generous gift from Shawn Ferguson (Roczniak-Ferguson & Ferguson, 2019)), were  
583 maintained in DMEM (Gibco/ThermoFisher) with 10% FBS and penicillin-streptomycin. DLD1-wildtype cells  
584 (ATCC) and DLD1-NXF1-AID cells (Aksenova *et al.*, 2020) were maintained in DMEM  
585 (Gibco/ThermoFisher) with 10% FBS and penicillin-streptomycin. All cell lines were validated by STR  
586 profiling, routinely verified to be mycoplasma negative, and frequently refreshed from frozen stocks.

587

## 588 **Mouse primary cortical neuron culture**

589 All animal procedures were approved by the Johns Hopkins Animal Care and Use Committee. Timed  
590 pregnant C57BL/6J females (Jackson Laboratory) were sacrificed by cervical dislocation at E16, cortex  
591 dissociated, and cells plated at 50,000/well on poly-D-lysine/laminin-coated, optical glass-bottom 96-well  
592 plates as described (Hayes *et al*, 2020, 2021). Growth medium consisted of Neurobasal supplemented with  
593 B27, Glutamax, and penicillin/streptomycin (Gibco/ThermoFisher).

594

## 595 **Cloning of recombinant constructs**

596 Plasmids for the expression of wild-type (WT) human TDP-43 and its variants in tissue culture cells (**Table**  
597 **1**) were prepared by Twist Biosciences via gene synthesis between the HindIII and NheI sites in the  
598 pTwistEF1 $\alpha$  expression vector. The expected sequences of TDP-43 open reading frames were verified by  
599 Sanger sequencing.

600

601 **Table 1. TDP-43 constructs**

| Expressed protein            | TDP-43 amino acids | Point mutations                   | Predicted size (kD) | ID #   |
|------------------------------|--------------------|-----------------------------------|---------------------|--------|
| WT TDP-43-V5                 | 1-414              | none                              | 44.7                | pK1194 |
| TDP-43 ( $\Delta$ RRM1,2)-V5 | 1-105; 260-414     | none                              | 28.9                | pK1195 |
| TDP-43 (2KQ)-V5              | 1-414              | K145Q, K192Q                      | 44.7                | pK1196 |
| TDP-43 (5FL)-V5              | 1-414              | F147L, F149L, F194L, F229L, F231L | 44.7                | pK1197 |

602

## 603 **RNA oligonucleotides**

604 Synthetic RNA oligonucleotides (**Table 2**) were obtained from IDT in the form of desalted lyophilized powder.

605 Upon reconstitution in sterile, RNase and DNase -free water, single use aliquots were stored at -70°C.

606

607 **Table 2. RNA oligonucleotides**

| Oligo             | RNA sequence with modifications<br>m: 2-O-methyl<br>*N: phosphorothioate backbone | Assay<br>PC: permeabilized cells<br>LC: live cells | ID # |
|-------------------|-----------------------------------------------------------------------------------|----------------------------------------------------|------|
| (GU) <sub>8</sub> | mG*UGUGUGUGUGUGUGU                                                                | PC                                                 | RK6  |
| 'AUG12'           | mA*mG*mU*GmUmGmAmAmUmG*mA*mA*mU                                                   | PC                                                 | RK41 |



633 carried out with or without 2.5 mM ATP (pH 7.5, Sigma-Aldrich) and HEK whole cell lysate (2.5 mg/mL in TRB),  
634 at 37°C for 30 minutes. A subset of assays included recombinant human importin  $\beta$  (71-876), a RanGTP-  
635 resistant variant (Drutovic *et al*, 2020). Cells were fixed for 15 min in 4% paraformaldehyde/PBS, washed 2x  
636 with PBS containing Hoechst (1:5000), and transferred to 50% glycerol/PBS for immediate imaging.

637

### 638 **Live-cell TDP-43 shuttling assays**

639 HeLa and DLD1 cells were plated in uncoated, optical glass-bottom 96-well plates (CellVis) to achieve  
640 ~75% confluence at the time of shuttling assays. For transcriptional inhibition, TDP-43 shuttling was  
641 initiated by treatment with actinomycin D (Sigma-Aldrich, in DMSO) or NVP-2 (Tocris Bioscience, in  
642 DMSO) at doses/times indicated in the figure legends. For splicing inhibition, cells were pretreated for 4 h  
643 with escalating doses of isoginkgetin (IGK, Millipore-Sigma, in DMSO) or pladienolide B (PLB, Cayman  
644 Chemicals, in DMSO), prior to addition of 250 nM NVP-2. For NXF1 ablation experiments, DLD1-wildtype  
645 and DLD1-NXF1-AID cells were pretreated for 0-8 hrs with 0.5 mM synthetic auxin (3-indoleacetic acid,  
646 Sigma, in ethanol), prior to addition of 250 nM NVP-2. At the conclusion of experiments, cells were fixed in  
647 4% paraformaldehyde/PBS (Electron Microscopy Sciences) for 15 minutes prior to immunostaining.

648

### 649 **Immunofluorescence**

650 Paraformaldehyde-fixed cells were rinsed with PBS and simultaneously permeabilized and blocked with 0.1%  
651 Triton-X 100 and 10% normal goat serum (NGS, Vector Labs) in PBS for 30 min at room temperature. Primary  
652 antibody in 10% NGS/PBS was added to the cells and incubated for 60-90 min at room temperature or  
653 overnight at 4°C. Cells were rinsed 2x with PBS and AF488 or AF647-labeled secondary antibody  
654 (ThermoFisher) was added in 10% NGS/PBS and incubated for 1 h at room temperature. Cells were rinsed with  
655 PBS containing Hoechst 33342 and transferred to 50% glycerol/PBS for imaging.

656

### 657 **RNA labeling**

658 For poly(A)-fluorescence in situ hybridization (FISH), cells were fixed in 10% formaldehyde (Sigma-Aldrich) in  
659 PBS for 20 min, permeabilized in 0.1% PBS-Tween for 10 min, and washed 3 times in 1x PBS and 2 times in 2x  
660 SSC buffer (Sigma-Aldrich) for five min each. Cells were prehybridized for 1 h in hybridization buffer at 42°C

661 (Thermo), and then incubated in Cy3-oligo-dT(45) probe (IDT, 100 nM in hybridization buffer) overnight at 42°C.  
662 Cells were washed with decreasing concentrations of SSC buffer at 42°C (2x, then 0.5x, then 0.1x in PBS, for  
663 20 min each), with Hoechst 33342 nuclear counterstain included in the final wash.

664  
665 For click-chemistry labeling of nascent RNA synthesis, cells were treated with 200 µM 5-ethynyl-uridine in  
666 culture media for 30 min, fixed with 4% paraformaldehyde/PBS for 15 min, permeabilized and blocked in 2%  
667 BSA/0.1%Tx-100 in PBS for 30 min, and labeled with 0.5 µM AF488-Picolyl Azide using the Click-&-Go Cell  
668 Reaction Buffer kit according to the manufacturers' instructions (all reagents from Click Chemistry Tools). Cells  
669 were subsequently immunolabeled for TDP-43 as described above.

670

### 671 **High content imaging and data analysis**

672 Automated imaging and analysis were carried out using an ImageXpress Micro Confocal high content  
673 microscope with MetaXpress software (Molecular Devices) as previously described (Hayes *et al*, 2020, 2021).  
674 Briefly, nine non-overlapping fields per well were imaged at 20x (immortalized cells) or 40x (neurons)  
675 magnification in spinning disc confocal mode with 60 µm pinhole, with exposures targeting half-maximal  
676 saturation (33,000 / 65,536 relative fluorescent units (RFU) in unbinned, 16-bit images). The background-  
677 corrected mean and integrated nuclear and cytoplasmic intensities and the nuclear/cytoplasmic (N/C) ratio were  
678 calculated using the translocation-enhanced module. Number and morphometry of nuclear puncta were  
679 calculated using the granularity module. The Hoechst counterstain was used to identify the nuclear/cytoplasmic  
680 boundary and nuclear and cytoplasmic compartments were set several pixels in and outside of the nuclear  
681 boundary to avoid edge effects. All image analysis was carried out on raw, unaltered images. Raw data were  
682 uniformly filtered to exclude errors of cell identification (probe intensity = 0) and non-physiologic N/C ratios (N/C  
683 <0.1 or >100). For transient transfections, data were filtered by mean intensity to exclude untransfected cells  
684 (<1000 RFU) and highly expressing cells (>45,000 RFU). Resulting data were normalized across technical and  
685 biological replicates as percent untreated controls or percent time 0, as indicated in the figure legends. The  
686 mean number of cells/well across replicates is also provided. The number of biological replicates (independent  
687 cell passages/experiments) was used as the N for statistical analyses.

688

689 **qPCR**

690 Cells were rinsed in PBS and lysed in TRIzol (ThermoFisher). Total RNA was isolated following the  
691 manufacturer's protocol and resuspended in nuclease-free water. First-strand cDNA synthesis was  
692 performed with 1ug of total RNA using the High-Capacity cDNA Reverse Transcription Kit (ThermoFisher).  
693 qPCR was performed using PowerSYBR Green PCR Master Mix (ThermoFisher) with 10ng of cDNA per  
694 well and exon-intron primers (500nM) as listed below, using a QuantStudio 3 Real-Time PCR System.

695

696 **Nuclear/cytoplasmic fractionation and immunoblotting**

697 24-48 h post-transfection with V5-tagged TDP-43 and RRM mutants, TDP-43 CRISPR KO HeLa cells were  
698 lysed for N/C fractionation and SDS-PAGE with the NE-PER kit (ThermoFisher) according to the  
699 manufacturer's instructions. Total protein concentration was measured using the DC Protein Assay kit (Bio-  
700 Rad). Nuclear (5 µg total protein) and cytoplasmic (10 µg total protein) fractions were boiled in Laemmli  
701 buffer (Bio-Rad), run on Criterion 4-20% Gels (Bio-Rad), and transferred to nitrocellulose membranes using  
702 a TransBlot Turbo system (BioRad). Membranes were blocked with 5% non-fat milk in TBS-Tween and  
703 probed by sequential incubation in primary antibody overnight at 4°C. Detection was via HRP-conjugated  
704 secondary antibodies/chemiluminescence using an ImageQuant LAS 4000 system (GE). Band intensities  
705 were measured using ImageQuant software.

706

707 **ATP quantification**

708 Permeabilized and live cells in TRB were lysed and ATP levels quantified using the CellTiter-Glo luminescence  
709 assay (Promega) according to the manufacturers' instructions. Luminescence was measured using a  
710 SpectraMax M3 microplate reader (Molecular Devices).

711

712 **Image processing for figures**

713 Immunofluorescence images were cropped and minimally processed for figures using Adobe Photoshop  
714 2021(v22.4.3) as follows and as indicated in the figure legends. For the purpose of raw intensity comparisons,  
715 including the nascent RNA signal (**Fig 1** and **Suppl fig 1**) and the TDP-43 nuclear signal in permeabilized cells  
716 (**Fig 2, 4**), the intensity histogram of the designated control was maximized based on the brightest and dimmest

717 pixels, and those parameters were subsequently applied to all other images. For comparisons of shifts in the  
718 N/C ratio (all other figures), the intensity histogram was independently maximized according to the brightest and  
719 dimmest pixels in each image, to enable adequate visualization of both the nuclear and cytoplasmic  
720 compartments. To aid in data visualization, in selected images the fire pseudo-color LUT was applied using  
721 FIJI/ImageJ (v2.1.0/1.53c) and the quantitative/linear map is provided in the image. All adjustments were linear  
722 (no gamma changes) and applied equally to the entire image. Immunoblots were cropped for space and no  
723 other processing was applied. Uncropped immunoblot images are provided in the source data.

724

## 725 **Statistical analysis**

726 Graphing and statistical analyses were carried out using Prism v9.2.0 (Graphpad), according to the  
727 methods detailed in the figure legends.

728

729

## 730 **FIGURE LEGENDS**

731

### 732 **Figure 1. NVP-2-induced RNA Pol II inhibition promotes TDP-43 nuclear export**

733 A. Newly-synthesized RNAs labeled with AF488-picolyl azide via 5-EU incorporation/'click chemistry' (top)  
734 and TDP-43 immunofluorescence (bottom) in HeLa cells treated with DMSO (vehicle) vs. NVP-2 for 1 h.  
735 Arrows indicate rRNA puncta unaffected by NVP-2. Scale bar = 25  $\mu$ m.

736 B, C. High content analysis of nascent RNA (AF488-azide) mean nuclear intensity (B) and TDP-43 nuclear  
737 to cytoplasmic (N/C) ratio (C) expressed as percent DMSO control. N = mean of 2442 cells/well in each of  
738 3 independent biological replicates. Mean  $\pm$  SD is shown. The IC<sub>50</sub> for 1 h treatment is indicated, as  
739 calculated by non-linear regression.

740 D. RBP N/C ratios in HeLa cells treated with 250 nM NVP-2 for 30 min to 6 h. Selected proteins are labeled  
741 (the full panel is detailed in **Suppl fig 2**). N = mean of 2716 cells/well. Curves were fit by non-linear  
742 regression using the mean of 2-4 biological replicates per RBP.

743

744 **Supplemental figure 1. Transcriptional blockade-induced TDP-43 nuclear export in HeLa and**

745 **neurons**

746 A. Nascent RNAs labeled with AF488-picolyl azide via 5-EU incorporation/'click chemistry' (top) and TDP-  
747 43 immunofluorescence (bottom) in HeLa cells treated with DMSO (vehicle) vs. Actinomycin D for 1 h.

748 Scale bar = 25  $\mu$ m.

749 B, C. High content analysis of nascent RNA (AF488-azide) mean nuclear intensity (B) and TDP-43 nuclear  
750 to cytoplasmic (N/C) ratio (C) expressed as percent DMSO control. N= mean of 2540 cells/well. Mean  $\pm$  SD  
751 of 3-4 biological replicates per condition is shown. The IC<sub>50</sub> for 1 h treatment is indicated, as calculated by  
752 non-linear regression.

753 D, E. Mean nuclear vs. cytoplasmic intensity of TDP-43 following NVP-2 (D) or Actinomycin D (E)

754 treatment. These are the source data that were used to calculate the N/C ratios in **Fig 1B,C** and **Suppl**  
755 **figure 1B,C**. The IC<sub>50</sub> for 1 h treatment is indicated, as calculated by non-linear regression.

756 F. Nascent RNAs labeled with AF488-picolyl azide via 5-EU incorporation/'click chemistry' (top) and TDP-  
757 43 immunofluorescence (bottom) in mouse primary cortical neurons cells treated with DMSO (vehicle), 250  
758 nM NVP-2, or 1  $\mu$ M Actinomycin D for 3 h. Arrows indicate rRNA puncta unaffected by NVP-2. Scale bar =  
759 25  $\mu$ m.

760 G-J. High content analysis of nascent RNA (AF488-azide) mean nuclear intensity and TDP-43 nuclear to  
761 cytoplasmic (N/C) ratio in primary neurons treated with NVP-2 (G,H) or Actinomycin D (I,J), expressed as  
762 percent DMSO control. N= mean of 534 cells/well in each of of 2 biological replicates. Mean  $\pm$  SD is shown.

763 K. Raw N/C ratio of endogenous TDP-43 vs. TDP-43-YFP and TDP-43-V5 in transiently transfected HeLa  
764 cells following 1-4 h treatment with 250 nM NVP-2. N= mean of 2070 cells/well in each of of 3 biological  
765 replicates. Mean  $\pm$  SD is shown.

766

767 **Supplemental figure 2. Comparison of NVP-2-induced shuttling among RBPs**

768 A. RBP N/C ratios in HeLa cells after 30 min (left) or 6 h (right) of 250 nM NVP-2 treatment, expressed as  
769 % time 0. N= mean of 2716 cells/well. Mean of 2-4 biological replicates per protein is shown.

770 B. RBP immunostaining in NVP-2-treated HeLa cells at designated timepoints following NVP-2 exposure.

771 Scale bar = 50  $\mu$ m.



772

773 **Figure 2. TDP-43 exits the nucleus by passive diffusion in permeabilized cells**

774 A. Schematic of permeabilized cell TDP-43 passive nuclear export assay. IF = immunofluorescence.

775 B. TDP-43 immunofluorescence (top) and Hoechst nuclear stain (bottom) in permeabilized HeLa cells fixed  
776 immediately post-permeabilization (0 min) and 60 min post-permeabilization, following incubation at 4°C or  
777 37°C. The intensity histogram for all TDP-43 images was normalized relative to the 0 min control, prior to  
778 application of the pseudo-color LUT (middle) to illustrate relative TDP-43 nuclear intensity. Scale bar = 50  
779 μm.

780 C. Integrated nuclear intensity of TDP-43 in permeabilized HeLa cells over time at 4°C vs. 37°C expressed  
781 as percent of time 0. N = mean of 2185 cells/well/condition in each of 4 independent biological replicates.

782 D. TDP-43 immunofluorescence staining (top) and Hoechst nuclear stain (bottom) in permeabilized HeLa  
783 cells incubated for 30 minutes post-permeabilization at 4°C vs. 37°C with increasing concentrations of 1,6-  
784 hexanediol. The intensity histogram for all TDP-43 images was normalized relative to 0% HD (4°C). Scale  
785 bar = 50μm.

786 E. Integrated nuclear intensity of TDP-43 in permeabilized HeLa cells incubated for 30 minutes at 4°C vs.  
787 37°C with increasing concentrations of 1,6-hexanediol. Data are expressed as percent untreated, 4°C. N =  
788 mean of 2389 cells/well/condition in each of 3 independent biological replicates.

789 In C, E, \*\*p<0.01, \*\*\*p<0.001, \*\*\*\*p<0.0001 by 2-way ANOVA with Tukey's multiple comparisons test.

790

791 **Supplemental figure 3. Validation of permeabilized cell passive export assay.**

792 A. Evaluation of nuclear pore and nuclear membrane integrity by exclusion of 70 kD Texas Red-dextran in  
793 digitonin-permeabilized HeLa cells in transport buffer. Scale bar = 20 μm.

794 B. ATP luciferase assay in intact versus digitonin-permeabilized HeLa cells, measured immediately  
795 following digitonin permeabilization. N=3 independent biological replicates. \*\*\*\*p<0.0001 by unpaired  
796 Student's t-test.

797 C. TDP-43 integrated nuclear intensity in permeabilized HeLa cells incubated for 30 min at 37°C with or  
798 without 100 nM Leptomycin B (LMB) treatment during permeabilization, wash, and export phases. Data are  
799 expressed as percent time 0. N = mean of 3005 cells/well in each of 6 technical replicates.

800 D. TDP-43 integrated nuclear intensity in permeabilized HeLa cells incubated for 30 min at 37°C with  
801 increasing concentrations of ATP (0 to 2 mM). Data are expressed as percent time 0. N = mean of 2883  
802 cells/well/condition in each of 3 independent biological replicates. NS = not significant, one-way ANOVA  
803 with Tukey's post-hoc test.

804 E. Rango integrated nuclear intensity in permeabilized HeLa cells incubated for 30 min at 37°C with or  
805 without HEK cell lysate, ATP (2.5 mM), and dominant-negative importin- $\beta$  (71-876) mutant. Data are  
806 expressed as percent untreated (dotted line). N = mean of 1289 cells/well in each of 2 technical replicates.  
807

808 **Figure 3. Acute NXF1 ablation does not alter NVP-2-induced TDP-43 nuclear export**

809 A. NXF1 immunoblot in DLD1-wild-type vs. DLD1-NXF1-AID cells treated with 0.5 mM auxin for 0-4 h. Note  
810 the increased molecular weight for AID-tagged NXF1 (\*) vs endogenous NXF1 (>).

811 B. Poly(A)-FISH (Cy3-OligodT(45)) in DLD1-wild-type vs. DLD1-NXF1-AID cells treated with 0.5 mM auxin  
812 for designated time. Scale bar = 25  $\mu$ m.

813 C. Poly(A)-RNA N/C ratio in DLD1-wild-type vs. DLD1-NXF1-AID cells treated with 0.5 mM auxin for 0-8 h.  
814 Data are expressed as percent wild-type untreated cells. N = mean of 3476 cells/well in each of 4  
815 independent biological replicates. Mean  $\pm$  SD is shown. \* $p < 0.05$ , \*\*\*\* $p < 0.0001$  versus wild-type, by 2-way  
816 ANOVA with Sidak's multiple comparisons test.

817 D. TDP-43 N/C ratio in DLD1-wild-type cells (left) and DLD1-NXF1-AID cells (right) pretreated with 0.5 mM  
818 auxin for 0-8 h, followed by 2 h auxin only (-NVP-2) or auxin + 250 nM NVP-2 (+NVP-2). Data in both  
819 panels are normalized to untreated DLD1-wild-type cells (dotted line).

820 E. TDP-43 N/C ratio in NVP-2 treated vs. untreated cells (+NVP-2 / -NVP-2) in DLD1-wild-type (black) vs.  
821 DLD1-NXF1-AID (red) cells. These are the same data as in (D), adjusted for differences in the steady-state  
822 TDP-43 N/C ratio, to permit comparison of NVP-2-induced TDP-43 nuclear exit.

823 In D-E, N = mean of 4610 cells/well in each of 4 independent biological replicates. Mean  $\pm$  SD is shown.  
824 \*\*\*\* $P < 0.0001$  for indicated comparisons by 2-way ANOVA with Sidak's multiple comparisons test.

825

826 **Figure 4. RNase and GU-rich oligomers induce TDP-43 nuclear efflux**

- 827 A. Schematic depicting addition of RNase (A-C) or RNA oligomers (D-G) to permeabilized cell TDP-43  
828 passive export assay.
- 829 B. Endogenous TDP-43 immunofluorescence (top) and Hoechst (bottom) in permeabilized HeLa cells  
830 incubated for 30 min at 4°C with or without RNase A. Arrows highlight formation of nuclear puncta by  
831 residual nuclear TDP-43. Scale bar = 25 µm.
- 832 C. TDP-43 integrated nuclear intensity in permeabilized HeLa cells incubated for 30 min at 4°C vs. 37°C  
833 with increasing concentrations of RNase A. Data are expressed as percent untreated cells at 4°C. N =  
834 mean of 2552 cells/well/condition in each of 4 independent biological replicates. \*\*\*\*p<0.0001 versus time 0  
835 by 2-way ANOVA with Tukey's multiple comparisons test.
- 836 D. TDP-43 integrated nuclear intensity in permeabilized HeLa cells incubated for 30 min at 4°C with  
837 increasing concentrations of A16, (GU)8, or 'AUG12' oligomers. Data are expressed as percent untreated  
838 cells. N = mean of 2968 cells/well/condition in each of 4 independent biological replicates.
- 839 E. TDP-43 integrated nuclear intensity in permeabilized HeLa cells incubated at 4°C, 25°C or 37°C for 30  
840 min with increasing concentrations of (GU)8. Data are expressed as percent untreated cells. N = mean of  
841 1039 cells/well/condition in each of 2 technical replicates.
- 842 F. Integrated nuclear intensity of designated nuclear RBPs in permeabilized HeLa cells incubated for 30  
843 minutes at 4°C with increasing concentrations (GU)8. Data are expressed as percent untreated cells. Note:  
844 TDP-43 data are the same as in (D). N = mean of 3421 cells/well in each of 4 independent biological  
845 replicates.
- 846 G. Integrated nuclear intensity of designated nuclear RBPs in permeabilized HeLa cells incubated for 30  
847 minutes at 4°C with increasing concentrations of the indicated RNA oligomers. Data are expressed as  
848 percent untreated cells. N = mean of 3293 cells/well/condition in each of 3-4 independent biological  
849 replicates.
- 850 H. Schematic of live HeLa cell transfection with protected RNA oligomers.
- 851 I. TDP-43 N/C ratio 5 h after transfection with protected A13 or (GU)6 RNA oligomers. Data are expressed  
852 as percent untreated cells. N = mean of 2887 cells/well/condition in each of 3 independent biological  
853 replicates.

854 J. RBP N/C ratios 5 h after transfection with protected (GU)<sub>6</sub> RNA oligomers. Data are expressed as  
855 percent untreated cells. Note: TDP-43 data are the same as those shown for (GU)<sub>6</sub> in (I). N = mean of  
856 2555 cells/well/condition in each of 3 independent biological replicates.  
857 In F,G,J: The RBP labeled in red corresponds to the most closely-predicted binding partner for that motif,  
858 and green indicates an RBP with a moderately-similar motif. Gray and black labels correspond to RBPs  
859 with no or low predicted binding activity to the given sequence.  
860 In D-J: RNA oligomer sequences are detailed in **Table 2**. Mean  $\pm$  SD is shown. IC<sub>50</sub> values were  
861 calculated by non-linear regression.

862

#### 863 **Supplemental figure 4. Nuclear and RNA integrity controls.**

864 A. Integrated nuclear intensity of DDX19b and Nup50 versus TDP-43 in permeabilized HeLa cells  
865 incubated for 30 minutes at 4°C (left) or 37°C (right) with increasing concentrations of RNase A. Data are  
866 expressed as percent untreated cells. N = mean of 2868 cells/well in each of 3 technical replicates. Mean  $\pm$   
867 SD is shown.

868 B. Integrated nuclear intensity of TDP-43 in permeabilized HeLa cells incubated for 30 or 60 min at 37°C  
869 with or without RNasin ribonuclease inhibitor. Data are expressed as percent time 0, untreated cells. N =  
870 mean of 3262 cells/well in each of 2 independent replicates.

871

#### 872 **Figure 5. Inhibition of pre-mRNA splicing promotes TDP-43 nuclear accumulation**

873 A. TDP-43 immunofluorescence in HeLa cells treated with IGK for 4 h, followed by 2 h of IGK only or IGK +  
874 250 mM NVP-2. Scale bar = 25  $\mu$ m.

875 B. TDP-43 N/C in IGK or IGK + NVP-2-treated cells, expressed as % untreated.

876 C. TDP-43 N/C ratio (same data as part B) expressed as % IGK only, to permit comparison of NVP-2-  
877 induced nuclear exit. IC<sub>50</sub> calculated by non-linear regression.

878 D. TDP-43 immunofluorescence in HeLa cells treated with PLB for 4 h, followed by 2 h of PLB only or PLB  
879 + 250 mM NVP-2. Scale bar = 25  $\mu$ m.

880 E. TDP-43 N/C in PLB or PLB + NVP-2-treated cells, expressed as % untreated.

881 F. TDP-43 N/C ratio (same data as part E) expressed as % PLB only, to permit comparison of NVP-2-  
882 induced nuclear exit.  $IC_{50}$  calculated by non-linear regression.  
883 In A,C: The intensity histogram for each image was independently maximized across the full range to  
884 enable comparison of nuclear vs. cytoplasmic signal, and a pseudo-color LUT was then applied (see linear  
885 scale at right).  
886 In B,C: N= mean of 2357 cells/well in each of 4 independent biological replicates. Mean  $\pm$  SD is shown.  
887 In E,F: N= mean of 2720 cells/well in each of 4 independent biological replicates. Mean  $\pm$  SD is shown.  
888 In B,C,E,F: \*\*\* $p < 0.001$ , \*\*\*\* $p < 0.0001$  by 2-way ANOVA with Tukey's multiple comparisons test.  
889 Comparisons as indicated with untreated cells (brackets) or between NVP-2-treated and untreated cells at  
890 each dose of splicing inhibitor (no brackets).  
891 See **suppl fig 5** for validation of IGK and PLB-induced intron accumulation by qRT-PCR.

892

### 893 **Supplemental figure 5. Validation of IGK and PLB-induced intron accumulation**

894 A-C. qRT-PCR quantification of  $\beta$ -tubulin (A), actin (B), and DNAJB1 (C) pre-mRNAs using exon-intron  
895 primer pairs, normalized to U6 snRNA expression. HeLa cells were treated for 4 h with IGK or PLB at  
896 indicated doses. Mean  $\pm$  SD is shown for N=2 technical replicates.

897

### 898 **Figure 6. Mutation or deletion of TDP-43 RRM domains disrupts TDP-43 nuclear localization**

899 A. Schematic of V5-tagged TDP-43 RRM mutant constructs (top) and V5 immunofluorescence (bottom) in  
900 transiently transfected TDP-43 CRISPR KO HeLa cells, after 1 h treatment with DMSO vs. 250 nM NVP-2.  
901 The intensity histogram for each image was independently maximized across the full range to enable  
902 comparison of nuclear vs. cytoplasmic signal, and a pseudo-color LUT was then applied (see linear scale  
903 at right). See **suppl fig 6** for validation of CRISPR knockdown of endogenous TDP-43. Scale bar = 25  $\mu$ m.  
904 B. Raw N/C ratio of TDP-43 wild-type vs. RRM mutant constructs in transiently transfected TDP-43  
905 CRISPR KO HeLa cells, following 1 h treatment with DMSO or 250 nM NVP-2. N= mean of 1015 cells/well  
906 in each of 4 replicates (2 technical and 2 biological). Mean  $\pm$  SD is shown.

907 C. N/C fractionation and immunoblotting of TDP-43 CRISPR KO HeLa cells, transiently transfected with  
908 V5-tagged TDP-43 constructs and treated for 3 h with DMSO vs. 250 nM NVP-2. Lamin B1 = nuclear  
909 marker. GAPDH = cytoplasmic marker.

910 D. N/C ratio of V5 nuclear vs. cytoplasmic signal calculated from N=3 immunoblots (derived from 2  
911 biological replicates). Ratios are expressed as % WT DMSO-treated cells.

912 In B,D: ns = not significant, \*\*\*\*p<0.0001 by 2-way ANOVA with Tukey's multiple comparisons test.

913

914 **Supplemental figure 6. TDP-43 CRISPR KO cell validation and effect of HSP70i on TDP-43**  
915 **granularity and nuclear localization.**

916 A. TDP-43 gene expression in wild-type vs. CRISPR KO HeLa cell lines by qRT-PCR, normalized to  
917 GAPDH expression. N=3 technical replicates.

918 B. Immunoblot comparing endogenous TDP-43 protein expression in wild-type vs. CRISPR KO HeLa cells  
919 (left). Level of expression of transiently transfected V5-tagged constructs vs. endogenous TDP-43, and  
920 immunodetection by TDP-43 (left) and V5 (right) antibodies is also shown.

921 C. YFP epifluorescence in TDP-43 CRISPR KO cells transiently transfected with TDP-43-5FL-YFP, before  
922 and after 3 h treatment with HSP70i (50  $\mu$ M). Arrows highlight examples of reduction in number of nuclear  
923 granules. Note that moderate cell migration occurs over the timecourse of the assay. Scale bar = 50  $\mu$ m.

924 D. High content analysis of number of TDP-43-YFP and TDP-43-5FL-YFP granules per nucleus in DMSO  
925 vs. HSP70i-treated cells, assessed via live, time-lapse imaging. N = mean of 2171 cells/well/condition in  
926 each of two independent biological replicates. Mean  $\pm$  SD is shown.

927 E. V5 immunofluorescence in TDP-43 CRISPR KO cells transiently transfected with V5-tagged wild-type  
928 and RRM mutant TDP-43 constructs, and treated for 3 h with DMSO vs. HSP70i (50  $\mu$ M). Note: Rare  
929 examples of puncta-containing nuclei are shown (arrows) which constitute only a minority of the cell  
930 population as quantified in (F). The intensity histogram for each image was independently maximized  
931 across the full range. Given the intense fluorescence of the puncta, this prevents visualization of the N/C  
932 gradients which are better appreciated in the more representative images in **Fig 6A**. Scale bar = 25  $\mu$ m.

933 F-H. High content granularity analysis in TDP-43 CRISPR KO cells transiently transfected with V5- or YFP-  
934 tagged wild-type and RRM mutant TDP-43 constructs, and treated with DMSO or HSP70i (50  $\mu$ M) for 3h.

935 Parameters include % cells with  $\geq 1$  puncta (F), # puncta/nucleus (G, expressed as % DMSO), and mean  
936 puncta area (H, expressed as % DMSO). N = mean of 1156 cells/well/condition in each of three  
937 independent biological replicates. Mean  $\pm$  SD is shown.

938 I. N/C ratio of V5 immunofluorescence signal, in TDP-43 CRISPR KO cells transiently transfected with V5-  
939 tagged wild-type and RRM mutant TDP-43 constructs, and treated with DMSO, NVP2 (250 nM), HSP70i  
940 (50  $\mu$ M), or both for 3h. Data are expressed as percent wild-type DMSO-treated cells. N = mean of 788  
941 cells/well/condition in each of three independent biological replicates.

942 In F-I: ns = not significant, \* $p < 0.05$ , \*\* $p < 0.01$ , \*\*\* $p < 0.001$ , \*\*\*\* $p < 0.0001$  for designated comparisons by 2-  
943 way ANOVA with Sidak's multiple comparisons test.

944

945 **Figure 7. Mechanisms coupling TDP-43 nuclear localization with nuclear GU-rich pre-mRNA binding**  
946 **and abundance.** Arrow size corresponds to predicted balance under normal physiologic conditions. See  
947 text for discussion.

948

#### 949 **ACKNOWLEDGEMENTS**

950 Lin Xue, Svetlana Vidensky, and Lin Jin provided expert technical assistance. Pei-Hsun Wu provided  
951 imaging assistance. Lyudmila Mamedova and Barbara Smith provided administrative support. This  
952 research was supported by NIH K08NS104273 and R01NS123538 (L.R.H.), DOD/CDRMP  
953 W81XWH1910209 (J.D.R. and L.R.H.), and the Robert Packard Center for ALS Research (L.R.H. and  
954 P.K.).

955

#### 956 **AUTHOR CONTRIBUTIONS**

957 L.D. – conceptualization, methodology, investigation, validation, formal analysis, visualization, writing-  
958 original draft, writing-review & editing; B.Z. – methodology, investigation, writing-review & editing; V.A. –  
959 methodology, resources, writing-review & editing; M.D. – resources, supervision, writing-review & editing;  
960 J.D.R. – supervision, funding acquisition, writing-review & editing; P.K. – conceptualization, methodology,  
961 investigation, resources, visualization, writing-original draft, writing-review & editing, funding acquisition;

962 L.R.H. – conceptualization, methodology, investigation, validation, formal analysis, visualization, writing-  
963 original draft, writing-review & editing, supervision, funding acquisition.

964

## 965 CONFLICTS OF INTEREST

966 The authors declare that they have no conflicts of interest to report.

967

## 968 REFERENCES

969

- 970 Adam SA, Marr RS & Gerace L (1990) Nuclear protein import in permeabilized mammalian cells requires  
971 soluble cytoplasmic factors. *J Cell Biol* 111: 807–816
- 972 Afroz T, Hock E-M, Ernst P, Foglieni C, Jambeau M, Gilhespy LAB, Laferrière F, Maniecka Z, Plückthun A,  
973 Mittl P, *et al* (2017) Functional and dynamic polymerization of the ALS-linked protein TDP-43  
974 antagonizes its pathologic aggregation. *Nature Communications* 8: 45
- 975 Aksenova V, Smith A, Lee H, Bhat P, Esnault C, Chen S, Iben J, Kaufhold R, Yau KC, Echeverria C, *et al*  
976 (2020) Nucleoporin TPR is an integral component of the TREX-2 mRNA export pathway. *Nature*  
977 *Communications* 11: 4577
- 978 Arai T, Hasegawa M, Akiyama H, Ikeda K, Nonaka T, Mori H, Mann D, Tsuchiya K, Yoshida M, Hashizume  
979 Y, *et al* (2006) TDP-43 is a component of ubiquitin-positive tau-negative inclusions in frontotemporal  
980 lobar degeneration and amyotrophic lateral sclerosis. *Biochem Biophys Res Commun* 351: 602–611
- 981 Archbold HC, Jackson KL, Arora A, Weskamp K, Tank EMH, Li X, Miguez R, Dayton RD, Tamir S, Klein  
982 RL, *et al* (2018) TDP43 nuclear export and neurodegeneration in models of amyotrophic lateral sclerosis  
983 and frontotemporal dementia. *Scientific reports* 8: 4606
- 984 Avendaño-Vázquez SE, Dhir A, Bembich S, Buratti E, Proudfoot N & Baralle FE (2012) Autoregulation of  
985 TDP-43 mRNA levels involves interplay between transcription, splicing, and alternative polyA site  
986 selection. *Gene Dev* 26: 1679–1684
- 987 Ayala YM, Zago P, D’Ambrogio A, Xu Y-F, Petrucelli L, Buratti E & Baralle FE (2008) Structural  
988 determinants of the cellular localization and shuttling of TDP-43. *J Cell Sci* 121: 3778–3785
- 989 Baejen C, Torkler P, Gressel S, Essig K, Söding J & Cramer P (2014) Transcriptome Maps of mRNP  
990 Biogenesis Factors Define Pre-mRNA Recognition. *Mol Cell* 55: 745–757
- 991 Bastiaens P, Caudron M, Niethammer P & Karsenti E (2006) Gradients in the self-organization of the  
992 mitotic spindle. *Trends Cell Biol* 16: 125–134
- 993 Bhardwaj A, Myers MP, Buratti E & Baralle FE (2013) Characterizing TDP-43 interaction with its RNA  
994 targets. *Nucleic acids research* 41: 5062–5074
- 995 Borroni B, Bonvicini C, Alberici A, Buratti E, Agosti C, Archetti S, Papetti A, Stuani C, Luca MD, Gennarelli  
996 M, *et al* (2009) Mutation within TARDBP leads to Frontotemporal Dementia without motor neuron  
997 disease. *Hum Mutat* 30: E974–E983
- 998 Boswell SA, Snavely A, Landry HM, Churchman LS, Gray JM & Springer M (2017) Total RNA-seq to  
999 identify pharmacological effects on specific stages of mRNA synthesis. *Nat Chem Biol* 13: 501–507
- 1000 Bresson S & Tollervey D (2018) Surveillance-ready transcription: nuclear RNA decay as a default fate.  
1001 *Open Biol* 8: 170270
- 1002 Broeck LV, Callaerts P & Dermaut B (2014) TDP-43-mediated neurodegeneration: towards a loss-of-  
1003 function hypothesis? *Trends in Molecular Medicine* 20: 66–71
- 1004 Bruun GH, Doktor TK, Borch-Jensen J, Masuda A, Krainer AR, Ohno K & Andresen BS (2016) Global  
1005 identification of hnRNP A1 binding sites for SSO-based splicing modulation. *Bmc Biol* 14: 54
- 1006 Buratti E (2015) Chapter One Functional Significance of TDP-43 Mutations in Disease. *Adv Genet* 91: 1–53
- 1007 Buratti E & Baralle FE (2001) Characterization and Functional Implications of the RNA Binding Properties  
1008 of Nuclear Factor TDP-43, a Novel Splicing Regulator of CFTR Exon 9\*. *J Biol Chem* 276: 36337–36343
- 1009 Butti Z & Patten SA (2019) RNA Dysregulation in Amyotrophic Lateral Sclerosis. *Frontiers Genetics* 9: 712
- 1010 Cáceres JF, Sreaton GR & Krainer AR (1998) A specific subset of SR proteins shuttles continuously  
1011 between the nucleus and the cytoplasm. *Genes & Development* 12: 55–66



- 1012 Carter GC, Hsiung C-H, Simpson L, Yang H & Zhang X (2021) N-terminal Domain of TDP43 Enhances  
1013 Liquid-Liquid Phase Separation of Globular Proteins. *J Mol Biol* 433: 166948
- 1014 Carvalho T, Martins S, Rino J, Marinho S & Carmo-Fonseca M (2017) Pharmacological inhibition of the  
1015 spliceosome subunit SF3b triggers exon junction complex-independent nonsense-mediated decay. *J*  
1016 *Cell Sci* 130: 1519–1531
- 1017 Cassany A & Gerace L (2009) Reconstitution of nuclear import in permeabilized cells. *Methods in*  
1018 *molecular biology (Clifton, NJ)* 464: 181–205
- 1019 Chi B, O'Connell JD, Iocolano AD, Coady JA, Yu Y, Gangopadhyay J, Gygi SP & Reed R (2018a) The  
1020 neurodegenerative diseases ALS and SMA are linked at the molecular level via the ASC-1 complex.  
1021 *Nucleic acids research* 46: 11939–11951
- 1022 Chi B, O'Connell JD, Yamazaki T, Gangopadhyay J, Gygi SP & Reed R (2018b) Interactome analyses  
1023 revealed that the U1 snRNP machinery overlaps extensively with the RNAP II machinery and contains  
1024 multiple ALS/SMA-causative proteins. *Sci Rep-uk* 8: 8755
- 1025 Choi HS, Hwang CK, Song KY, Law P-Y, Wei L-N & Loh HH (2009) Poly(C)-binding proteins as  
1026 transcriptional regulators of gene expression. *Biochem Biophys Res Co* 380: 431–436
- 1027 Cohen TJ, Hwang AW, Restrepo CR, Yuan C-X, Trojanowski JQ & Lee VMY (2015) An acetylation switch  
1028 controls TDP-43 function and aggregation propensity. *Nature Communications* 6: 5845
- 1029 Colbeau A, Nachbaur J & Vignais PM (1971) Enzymic characterization and lipid composition of rat liver  
1030 subcellular membranes. *Biochimica et biophysica acta* 249: 462–492
- 1031 Conicella AE, Dignon GL, Zerze GH, Schmidt HB, D'Ordine AM, Kim YC, Rohatgi R, Ayala YM, Mittal J &  
1032 Fawzi NL (2020) TDP-43  $\alpha$ -helical structure tunes liquid–liquid phase separation and function. *Proc*  
1033 *National Acad Sci* 117: 5883–5894
- 1034 Conicella AE, Zerze GH, Mittal J & Fawzi NL (2016) ALS Mutations Disrupt Phase Separation Mediated by  
1035  $\alpha$ -Helical Structure in the TDP-43 Low-Complexity C-Terminal Domain. *Structure* 24: 1537–1549
- 1036 Corley M, Burns MC & Yeo GW (2020) How RNA-Binding Proteins Interact with RNA: Molecules and  
1037 Mechanisms. *Mol Cell* 78: 9–29
- 1038 Day RN & Davidson MW (2009) The fluorescent protein palette: tools for cellular imaging. *Chem Soc Rev*  
1039 38: 2887–2921
- 1040 Deerlin VMV, Leverenz JB, Bekris LM, Bird TD, Yuan W, Elman LB, Clay D, Wood EM, Chen-Plotkin AS,  
1041 Martinez-Lage M, *et al* (2008) TARDBP mutations in amyotrophic lateral sclerosis with TDP-43  
1042 neuropathology: a genetic and histopathological analysis. *The Lancet Neurology* 7: 409–416
- 1043 Drutovic D, Duan X, Li R, Kalab P & Solc P (2020) RanGTP and importin  $\beta$  regulate meiosis I spindle  
1044 assembly and function in mouse oocytes. *Embo J* 39: e101689
- 1045 Ederle H & Dormann D (2017) TDP-43 and FUS en route from the nucleus to the cytoplasm. *FEBS Letters*  
1046 591: 1489–1507
- 1047 Ederle H, Funk C, Abou-Ajram C, Hutten S, Funk EBE, Kehlenbach RH, Bailer SM & Dormann D (2018)  
1048 Nuclear egress of TDP-43 and FUS occurs independently of Exportin-1/CRM1. *Scientific reports* 8:  
1049 7084
- 1050 Elden AC, Kim H-J, Hart MP, Chen-Plotkin AS, Johnson BS, Fang X, Armarkola M, Geser F, Greene R, Lu  
1051 MM, *et al* (2010) Ataxin-2 intermediate-length polyglutamine expansions are associated with increased  
1052 risk for ALS. *Nature* 466: 1069–1075
- 1053 Falcón-Pérez JM, Nazarian R, Sabatti C & Dell'Angelica EC (2005) Distribution and dynamics of Lamp1-  
1054 containing endocytic organelles in fibroblasts deficient in BLOC-3. *J Cell Sci* 118: 5243–5255
- 1055 Fan XC & Steitz JA (1998) HNS, a nuclear-cytoplasmic shuttling sequence in HuR. *Proc National Acad Sci*  
1056 95: 15293–15298
- 1057 Flores BN, Li X, Malik AM, Martinez J, Beg AA & Barmada SJ (2019) An Intramolecular Salt Bridge Linking  
1058 TDP43 RNA Binding, Protein Stability, and TDP43-Dependent Neurodegeneration. *Cell Reports* 27:  
1059 1133-1150.e8
- 1060 François-Moutal L, Perez-Miller S, Scott DD, Miranda VG, Mollasalehi N & Khanna M (2019) Structural  
1061 Insights Into TDP-43 and Effects of Post-translational Modifications. *Frontiers in molecular neuroscience*  
1062 12: 1199
- 1063 Freibaum BD, Chitta RK, High AA & Taylor JP (2010) Global analysis of TDP-43 interacting proteins  
1064 reveals strong association with RNA splicing and translation machinery. *Journal of proteome research* 9:  
1065 1104–1120

- 1066 French RL, Grese ZR, Aligireddy H, Dhavale DD, Reeb AN, Kedia N, Kotzbauer PT, Bieschke J & Ayala  
1067 YM (2019) Detection of TAR DNA-binding protein 43 (TDP-43) oligomers as initial intermediate species  
1068 during aggregate formation. *Journal of Biological Chemistry* 294: 6696–6709
- 1069 Frey S, Rees R, Schünemann J, Ng SC, Fünfgeld K, Huyton T & Görlich D (2018) Surface Properties  
1070 Determining Passage Rates of Proteins through Nuclear Pores. *Cell* 174: 202-217.e9
- 1071 Furlanis E, Traunmüller L, Fucile G & Scheiffele P (2019) Landscape of ribosome-engaged transcript  
1072 isoforms reveals extensive neuronal-cell-class-specific alternative splicing programs. *Nat Neurosci* 22:  
1073 1709–1717
- 1074 Gasset-Rosa F, Lu S, Yu H, Chen C, Melamed Z, Guo L, Shorter J, Cruz SD & Cleveland DW (2019)  
1075 Cytoplasmic TDP-43 De-mixing Independent of Stress Granules Drives Inhibition of Nuclear Import,  
1076 Loss of Nuclear TDP-43, and Cell Death. *Neuron* 102: 339-357.e7
- 1077 Gasteiger E, Hoogland C, Gattiker A, Duvaud S, Wilkins MR, Appel RD & Bairoch A (2005) The  
1078 Proteomics Protocols Handbook. 571–607
- 1079 Gilbertson S, Federspiel JD, Hartenian E, Cristea IM & Glaunsinger B (2018) Changes in mRNA  
1080 abundance drive shuttling of RNA binding proteins, linking cytoplasmic RNA degradation to  
1081 transcription. *eLife* 7: e37663
- 1082 Gitcho MA, Baloh RH, Chakraverty S, Mayo K, Norton JB, Levitch D, Hatanpaa KJ, White CL, Bigio EH,  
1083 Caselli R, *et al* (2008) TDP-43 A315T mutation in familial motor neuron disease. *Ann Neurol* 63: 535–  
1084 538
- 1085 Gopal PP, Nirschl JJ, Klinman E & Holzbaur ELF (2017) Amyotrophic lateral sclerosis-linked mutations  
1086 increase the viscosity of liquid-like TDP-43 RNP granules in neurons. *Proc National Acad Sci* 114:  
1087 E2466–E2475
- 1088 Goss DJ & Kleiman FE (2013) Poly(A) binding proteins: are they all created equal? *Wiley Interdiscip Rev*  
1089 *Rna* 4: 167–179
- 1090 Grünwald D, Singer RH & Rout M (2011) Nuclear export dynamics of RNA-protein complexes. *Nature* 475:  
1091 333–341
- 1092 Hafner M, Katsantoni M, Köster T, Marks J, Mukherjee J, Staiger D, Ule J & Zavolan M (2021) CLIP and  
1093 complementary methods. *Nat Rev Methods Primers* 1: 20
- 1094 Hayes LR, Duan L, Bowen K, Kalab P & Rothstein JD (2020) C9orf72 arginine-rich dipeptide repeat  
1095 proteins disrupt karyopherin-mediated nuclear import. *eLife* 9: e51685
- 1096 Hayes LR, Duan L, Vidensky S & Kalab P (2021) Nuclear Transport Assays in Permeabilized Mouse  
1097 Cortical Neurons. *J Vis Exp*, doi: 10.3791/62710
- 1098 Hermey G, Blüthgen N & Kuhl D (2017) Neuronal activity-regulated alternative mRNA splicing. *Int J*  
1099 *Biochem Cell Biology* 91: 184–193
- 1100 Hodge CA, Tran EJ, Noble KN, Alcazar-Roman AR, Ben-Yishay R, Scarcelli JJ, Folkmann AW, Shav-Tal  
1101 Y, Wente SR & Cole CN (2011) The Dbp5 cycle at the nuclear pore complex during mRNA export I:  
1102 dbp5 mutants with defects in RNA binding and ATP hydrolysis define key steps for Nup159 and Gle1.  
1103 *Genes & Development* 25: 1052–1064
- 1104 Jaffrey SR & Wilkinson MF (2018) Nonsense-mediated RNA decay in the brain: emerging modulator of  
1105 neural development and disease. *Nat Rev Neurosci* 19: 715–728
- 1106 Jain N, Lin H-C, Morgan CE, Harris ME & Tolbert BS (2017) Rules of RNA specificity of hnRNP A1  
1107 revealed by global and quantitative analysis of its affinity distribution. *Proceedings of the National*  
1108 *Academy of Sciences* 114: 2206–2211
- 1109 Jao CY & Salic A (2008) Exploring RNA transcription and turnover in vivo by using click chemistry.  
1110 *Proceedings of the National Academy of Sciences* 105: 15779–15784
- 1111 Junod SL, Kelich JM, Ma J & Yang W (2020) Nucleocytoplasmic transport of intrinsically disordered  
1112 proteins studied by high-speed super-resolution microscopy. *Protein Sci* 29: 1459–1472
- 1113 Kabashi E, Valdmanis PN, Dion P, Spiegelman D, McConkey BJ, Velde CV, Bouchard J-P, Lacomblez L,  
1114 Pochigaeva K, Salachas F, *et al* (2008) TARDBP mutations in individuals with sporadic and familial  
1115 amyotrophic lateral sclerosis. *Nat Genet* 40: 572–574
- 1116 Kaida D, Motoyoshi H, Tashiro E, Nojima T, Hagiwara M, Ishigami K, Watanabe H, Kitahara T, Yoshida T,  
1117 Nakajima H, *et al* (2007) Spliceostatin A targets SF3b and inhibits both splicing and nuclear retention of  
1118 pre-mRNA. *Nat Chem Biol* 3: 576–583
- 1119 Kalab P, Pralle A, Isacoff EY, Heald R & Weis K (2006) Analysis of a RanGTP-regulated gradient in mitotic  
1120 somatic cells. *Nature* 440: 697–701

- 1121 Kapinos LE, Huang B, Rencurel C & Lim RYH (2017) Karyopherins regulate nuclear pore complex barrier  
1122 and transport function. *The Journal of Cell Biology* 216: 3609–3624
- 1123 Kilchert C, Wittmann S & Vasiljeva L (2016) The regulation and functions of the nuclear RNA exosome  
1124 complex. *Nat Rev Mol Cell Bio* 17: 227–239
- 1125 Kondo Y, Oubridge C, Roon A-MM van & Nagai K (2015) Crystal structure of human U1 snRNP, a small  
1126 nuclear ribonucleoprotein particle, reveals the mechanism of 5' splice site recognition. *eLife* 4: e04986
- 1127 Kotake Y, Sagane K, Owa T, Mimori-Kiyosue Y, Shimizu H, Uesugi M, Ishihama Y, Iwata M & Mizui Y  
1128 (2007) Splicing factor SF3b as a target of the antitumor natural product pladienolide. *Nat Chem Biol* 3:  
1129 570–575
- 1130 Kovacs GG, Murrell JR, Horvath S, Haraszti L, Majtenyi K, Molnar MJ, Budka H, Ghetti B & Spina S (2009)  
1131 TARDBP variation associated with frontotemporal dementia, supranuclear gaze palsy, and chorea.  
1132 *Movement Disord* 24: 1842–1847
- 1133 Lebedeva S, Jens M, Theil K, Schwanhäusser B, Selbach M, Landthaler M & Rajewsky N (2011)  
1134 Transcriptome-wide Analysis of Regulatory Interactions of the RNA-Binding Protein HuR. *Mol Cell* 43:  
1135 340–352
- 1136 Lee Y & Rio DC (2015) Mechanisms and Regulation of Alternative Pre-mRNA Splicing. *Annu Rev Biochem*  
1137 84: 1–33
- 1138 Lin DH, Correia AR, Cai SW, Huber FM, Jette CA & Hoelz A (2018) Structural and functional analysis of  
1139 mRNA export regulation by the nuclear pore complex. *Nat Commun* 9: 2319
- 1140 Ling JP, Pletnikova O, Troncoso JC & Wong PC (2015) TDP-43 repression of nonconserved cryptic exons  
1141 is compromised in ALS-FTD. *Science* 349: 650–655
- 1142 Ling JP, Wilks C, Charles R, Leavey PJ, Ghosh D, Jiang L, Santiago CP, Pang B, Venkataraman A, Clark  
1143 BS, *et al* (2020) ASCOT identifies key regulators of neuronal subtype-specific splicing. *Nat Commun* 11:  
1144 137
- 1145 Ling S-C, Polymenidou M & Cleveland DW (2013) Converging mechanisms in ALS and FTD: disrupted  
1146 RNA and protein homeostasis. *Neuron* 79: 416–438
- 1147 Lukavsky PJ, Daujotyte D, Tollervey JR, Ule J, Stuani C, Buratti E, Baralle FE, Damberger FF & Allain FH-  
1148 T (2013) Molecular basis of UG-rich RNA recognition by the human splicing factor TDP-43. *Nature*  
1149 *Structural & Molecular Biology* 20: 1443–1449
- 1150 Maharana S, Wang J, Papadopoulos DK, Richter D, Pozniakovskiy A, Poser I, Bickle M, Rizk S, Guillén-  
1151 Boixet J, Franzmann TM, *et al* (2018) RNA buffers the phase separation behavior of prion-like RNA  
1152 binding proteins. *Science* 360: 918–921
- 1153 Mann JR, Gleixner AM, Mauna JC, Gomes E, DeChellis-Marks MR, Needham PG, Copley KE, Hurtle B,  
1154 Portz B, Pyles NJ, *et al* (2019) RNA Binding Antagonizes Neurotoxic Phase Transitions of TDP-43.  
1155 *Neuron* 102: 321-338.e8
- 1156 Massey AJ, Williamson DS, Browne H, Murray JB, Dokurno P, Shaw T, Macias AT, Daniels Z, Geoffroy S,  
1157 Dopson M, *et al* (2010) A novel, small molecule inhibitor of Hsc70/Hsp70 potentiates Hsp90 inhibitor  
1158 induced apoptosis in HCT116 colon carcinoma cells. *Cancer Chemoth Pharm* 66: 535–545
- 1159 Mauger O, Lemoine F & Scheiffele P (2016) Targeted Intron Retention and Excision for Rapid Gene  
1160 Regulation in Response to Neuronal Activity. *Neuron* 92: 1266–1278
- 1161 Merendino L, Guth S, Bilbao D, Martínez C & Valcárcel J (1999) Inhibition of msl-2 splicing by Sex-lethal  
1162 reveals interaction between U2AF35 and the 3' splice site AG. *Nature* 402: 838–841
- 1163 Michael WM, Choi M & Dreyfuss G (1995) A nuclear export signal in hnRNP A1: a signal-mediated,  
1164 temperature-dependent nuclear protein export pathway. *Cell* 83: 415–422
- 1165 Michael WM, Eder PS & Dreyfuss G (1997) The K nuclear shuttling domain: a novel signal for nuclear  
1166 import and nuclear export in the hnRNP K protein. *The EMBO Journal* 16: 3587–3598
- 1167 Mohr D, Frey S, Fischer T, Güttler T & Görlich D (2009) Characterisation of the passive permeability barrier  
1168 of nuclear pore complexes. *The EMBO Journal* 28: 2541–2553
- 1169 Mollieux A, Temirov J, Lee J, Coughlin M, Kanagaraj AP, Kim HJ, Mittag T & Taylor JP (2015) Phase  
1170 separation by low complexity domains promotes stress granule assembly and drives pathological  
1171 fibrillization. *Cell* 163: 123–133
- 1172 Mompeán M, Romano V, Pantoja-Uceda D, Stuani C, Baralle FE, Buratti E & Laurents DV (2017) Point  
1173 mutations in the N-terminal domain of transactive response DNA-binding protein 43 kDa (TDP-43)  
1174 compromise its stability, dimerization, and functions. *J Biol Chem* 292: 11992–12006

- 1175 Nakielny S & Dreyfuss G (1996) The hnRNP C proteins contain a nuclear retention sequence that can  
1176 override nuclear export signals. *J Cell Biology* 134: 1365–1373
- 1177 Nakielny S & Dreyfuss G (1999) Transport of Proteins and RNAs in and out of the Nucleus. *Cell* 99: 677–  
1178 690
- 1179 Napetschnig J, Kassube SA, Debler EW, Wong RW, Blobel G & Hoelz A (2009) Structural and functional  
1180 analysis of the interaction between the nucleoporin Nup214 and the DEAD-box helicase Ddx19. *Proc*  
1181 *National Acad Sci* 106: 3089–3094
- 1182 Neumann M, Sampathu DM, Kwong LK, Truax AC, Micsenyi MC, Chou TT, Bruce J, Schuck T, Grossman  
1183 M, Clark CM, *et al* (2006) Ubiquitinated TDP-43 in Frontotemporal Lobar Degeneration and Amyotrophic  
1184 Lateral Sclerosis. *Science* 314: 130–133
- 1185 Nguyen TM, Kabotyanski EB, Reineke LC, Shao J, Xiong F, Lee J-H, Dubrulle J, Johnson H, Stossi F, Tsoi  
1186 PS, *et al* (2019) The SINEB1 element in the long non-coding RNA Malat1 is necessary for TDP-43  
1187 proteostasis. *Nucleic Acids Res* 48: 2621–2642
- 1188 Nishimura AL, Zupunski V, Troakes C, Kathe C, Fratta P, Howell M, Gallo J-M, Hortobágyi T, Shaw CE &  
1189 Rogelj B (2010) Nuclear import impairment causes cytoplasmic trans-activation response DNA-binding  
1190 protein accumulation and is associated with frontotemporal lobar degeneration. *Brain* 133: 1763–1771
- 1191 Nostrand ELV, Freese P, Pratt GA, Wang X, Wei X, Xiao R, Blue SM, Chen J-Y, Cody NAL, Dominguez D,  
1192 *et al* (2020) A large-scale binding and functional map of human RNA-binding proteins. *Nature* 583: 711–  
1193 719
- 1194 Nussbacher JK, Tabet R, Yeo GW & Lagier-Tourenne C (2019) Disruption of RNA Metabolism in  
1195 Neurological Diseases and Emerging Therapeutic Interventions. *Neuron* 102: 294–320
- 1196 O'Brien K, Matlin AJ, Lowell AM & Moore MJ (2008) The Biflavonoid Isoginkgetin Is a General Inhibitor of  
1197 Pre-mRNA Splicing. *J Biological Chem* 283: 33147–33154
- 1198 Okamura M, Inose H & Masuda S (2015) RNA Export through the NPC in Eukaryotes. *Genes-basel* 6:  
1199 124–149
- 1200 Olson CM, Jiang B, Erb MA, Liang Y, Doctor ZM, Zhang Z, Zhang T, Kwiatkowski N, Boukhali M, Green JL,  
1201 *et al* (2018) Pharmacological perturbation of CDK9 using selective CDK9 inhibition or degradation. *Nat*  
1202 *Chem Biol* 14: 163–170
- 1203 Paci G, Zheng T, Caria J, Zilman A & Lemke EA (2020) Molecular determinants of large cargo transport  
1204 into the nucleus. *eLife* 9: e55963.
- 1205 Paz I, Kosti I, Ares M, Cline M & Mandel-Gutfreund Y (2014) RBPmap: a web server for mapping binding  
1206 sites of RNA-binding proteins. *Nucleic Acids Res* 42: W361–W367
- 1207 Pinarbasi ES, Cağatay T, Fung HYJ, Li YC, Chook YM & Thomas PJ (2018) Active nuclear import and  
1208 passive nuclear export are the primary determinants of TDP-43 localization. *Scientific reports* 8: 7083
- 1209 Piñol-Roma S & Dreyfuss G (1992) Shuttling of pre-mRNA binding proteins between nucleus and  
1210 cytoplasm. *Nature* 355: 730–732
- 1211 Polymenidou M, Lagier-Tourenne C, Hutt KR, Huelga SC, Moran J, Liang TY, Ling S-C, Sun E, Wancewicz  
1212 E, Mazur C, *et al* (2011) Long pre-mRNA depletion and RNA missplicing contribute to neuronal  
1213 vulnerability from loss of TDP-43. *Nature Neuroscience* 14: 459–468
- 1214 Prasad A, Bharathi V, Sivalingam V, Girdhar A & Patel BK (2019) Molecular Mechanisms of TDP-43  
1215 Misfolding and Pathology in Amyotrophic Lateral Sclerosis. *Frontiers in molecular neuroscience* 12: 25
- 1216 Price AJ, Hwang T, Tao R, Burke EE, Rajpurohit A, Shin JH, Hyde TM, Kleinman JE, Jaffe AE &  
1217 Weinberger DR (2019) Characterizing the nuclear and cytoplasmic transcriptomes in developing and  
1218 mature human cortex uncovers new insight into psychiatric disease gene regulation. *Genome Res* 30:  
1219 1–11
- 1220 Rafiee M-R, Zagalak JA, Sidorov S, Steinhauser S, Davey K, Ule J & Luscombe NM (2021) Chromatin-  
1221 contact atlas reveals disorder-mediated protein interactions and moonlighting chromatin-associated  
1222 RBPs. *Biorxiv*: doi: 10.1101/2020.07.13.200212
- 1223 Ribbeck K & Görlich D (2002) The permeability barrier of nuclear pore complexes appears to operate via  
1224 hydrophobic exclusion. *The EMBO Journal* 21: 2664–2671
- 1225 Rocznik-Ferguson A & Ferguson SM (2019) Pleiotropic requirements for human TDP-43 in the regulation  
1226 of cell and organelle homeostasis. *Life Sci Alliance* 2: e201900358
- 1227 Saini H, Bicknell AA, Eddy SR & Moore MJ (2019) Free circular introns with an unusual branchpoint in  
1228 neuronal projections. *eLife* 8: e47809

- 1229 Sato M, Muguruma N, Nakagawa T, Okamoto K, Kimura T, Kitamura S, Yano H, Sannomiya K, Goji T,  
1230 Miyamoto H, *et al* (2014) High antitumor activity of pladienolide B and its derivative in gastric cancer.  
1231 *Cancer Sci* 105: 110–116
- 1232 Sharifi S & Bierhoff H (2018) Regulation of RNA Polymerase I Transcription in Development, Disease, and  
1233 Aging. *Annu Rev Biochem* 87: 1–23
- 1234 Silanes IL de, Zhan M, Lal A, Yang X & Gorospe M (2004) Identification of a target RNA motif for RNA-  
1235 binding protein HuR. *P Natl Acad Sci Usa* 101: 2987–2992
- 1236 Snapp EL, Hegde RS, Francolini M, Lombardo F, Colombo S, Pedrazzini E, Borgese N & Lippincott-  
1237 Schwartz J (2003) Formation of stacked ER cisternae by low affinity protein interactions. *J Cell Biology*  
1238 163: 257–269
- 1239 Soh S, Byrska M, Kandere-Grzybowska K & Grzybowski BA (2010) Reaction-Diffusion Systems in  
1240 Intracellular Molecular Transport and Control. *Angewandte Chemie Int Ed* 49: 4170–4198
- 1241 Sreedharan J, Blair IP, Tripathi VB, Hu X, Vance C, Rogelj B, Ackerley S, Durnall JC, Williams KL, Buratti  
1242 E, *et al* (2008) TDP-43 Mutations in Familial and Sporadic Amyotrophic Lateral Sclerosis. *Science* 319:  
1243 1668–1672
- 1244 Sun H, Chen W, Chen L & Zheng W (2021) Exploring the molecular basis of UG-rich RNA recognition by  
1245 the human splicing factor TDP-43 using molecular dynamics simulation and free energy calculation. *J*  
1246 *Comput Chem* 42: 1670–1680
- 1247 Talhouarne GJS & Gall JG (2018) Lariat intronic RNAs in the cytoplasm of vertebrate cells. *Proc National*  
1248 *Acad Sci* 115: 201808816
- 1249 Tank EM, Figueroa-Romero C, Hinder LM, Bedi K, Archbold HC, Li X, Weskamp K, Safren N, Paez-  
1250 Colasante X, Pacut C, *et al* (2018) Abnormal RNA stability in amyotrophic lateral sclerosis. *Nat*  
1251 *Commun* 9: 2845
- 1252 Timney BL, Raveh B, Mironska R, Trivedi JM, Kim SJ, Russel D, Wente SR, Sali A & Rout MP (2016)  
1253 Simple rules for passive diffusion through the nuclear pore complex. *The Journal of Cell Biology* 215:  
1254 57–76
- 1255 Tollervey JR, Curk T, Rogelj B, Briese M, Cereda M, Kayikci M, König J, Hortobágyi T, Nishimura AL,  
1256 Zupunski V, *et al* (2011) Characterizing the RNA targets and position-dependent splicing regulation by  
1257 TDP-43. *Nature Neuroscience* 14: 452–458
- 1258 Tuck AC & Tollervey D (2013) A Transcriptome-wide Atlas of RNP Composition Reveals Diverse Classes  
1259 of mRNAs and lncRNAs. *Cell* 154: 996–1009
- 1260 Tyssowski KM & Gray JM (2019) The neuronal stimulation–transcription coupling map. *Curr Opin*  
1261 *Neurobiol* 59: 87–94
- 1262 Wang C, Duan Y, Duan G, Wang Q, Zhang K, Deng X, Qian B, Gu J, Ma Z, Zhang S, *et al* (2020) Stress  
1263 Induces Dynamic, Cytotoxicity-Antagonizing TDP-43 Nuclear Bodies via Paraspeckle lncRNA NEAT1-  
1264 Mediated Liquid-Liquid Phase Separation. *Molecular Cell* 79: 443-458.e7
- 1265 Weskamp K, Tank EM, Miguez R, McBride JP, Gómez NB, White M, Lin Z, Gonzalez CM, Serio A,  
1266 Sreedharan J, *et al* (2020) Shortened TDP43 isoforms upregulated by neuronal hyperactivity drive  
1267 TDP43 pathology in ALS. *Journal of Clinical Investigation* 130: 1139–1155
- 1268 Wheeler EC, Nostrand ELV & Yeo GW (2018) Advances and challenges in the detection of transcriptome-  
1269 wide protein–RNA interactions. *Wiley Interdiscip Rev Rna* 9
- 1270 Whitehurst AW, Wilsbacher JL, You Y, Luby-Phelps K, Moore MS & Cobb MH (2002) ERK2 enters the  
1271 nucleus by a carrier-independent mechanism. *Proc National Acad Sci* 99: 7496–7501
- 1272 Winton MJ, Igaz LM, Wong MM, Kwong LK, Trojanowski JQ & Lee VMY (2008) Disturbance of nuclear and  
1273 cytoplasmic TAR DNA-binding protein (TDP-43) induces disease-like redistribution, sequestration, and  
1274 aggregate formation. *The Journal of biological chemistry* 283: 13302–13309
- 1275 Wu S, Romfo CM, Nilsen TW & Green MR (1999) Functional recognition of the 3' splice site AG by the  
1276 splicing factor U2AF35. *Nature* 402: 832–835
- 1277 Yu H, Lu S, Gasior K, Singh D, Vazquez-Sanchez S, Tapia O, Toprani D, Beccari MS, Yates JR, Cruz SD,  
1278 *et al* (2020) HSP70 chaperones RNA-free TDP-43 into anisotropic intranuclear liquid spherical shells.  
1279 *Science*
- 1280 Zacco E, Martin SR, Thorogate R & Pastore A (2018) The RNA-Recognition Motifs of TAR DNA-Binding  
1281 Protein 43 May Play a Role in the Aberrant Self-Assembly of the Protein. *Front Mol Neurosci* 11: 372

- 1282 Zaepfel BL & Rothstein JD (2021) RNA Is a Double-Edged Sword in ALS Pathogenesis. *Front Cell*  
1283 *Neurosci* 15: 708181
- 1284 Zorio DAR & Blumenthal T (1999) Both subunits of U2AF recognize the 3' splice site in *Caenorhabditis*  
1285 *elegans*. *Nature* 402: 835–838  
1286

# Figure 1

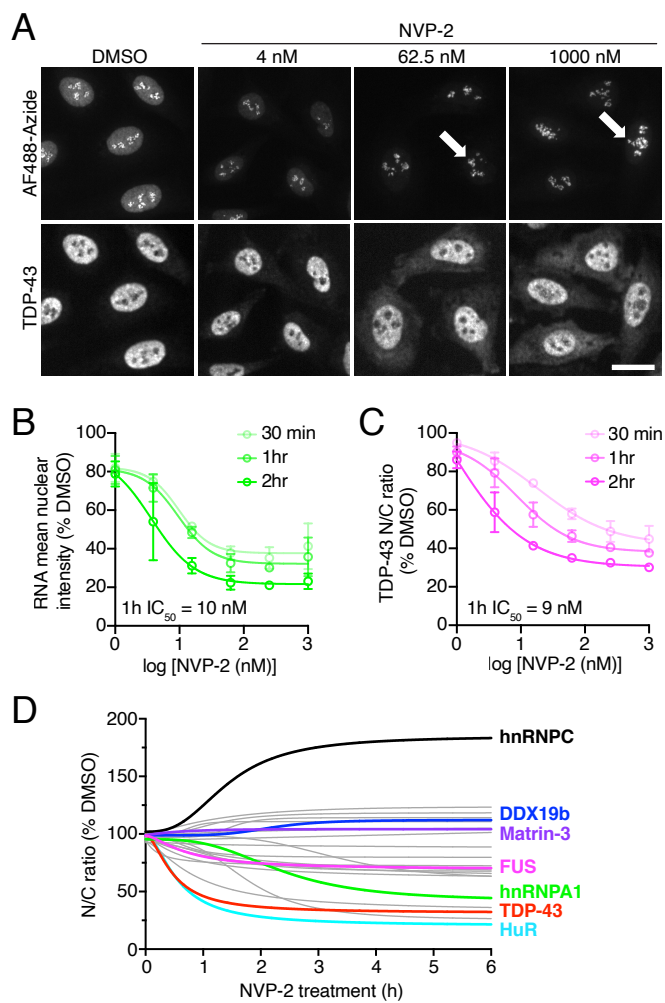

# Supplemental figure 1

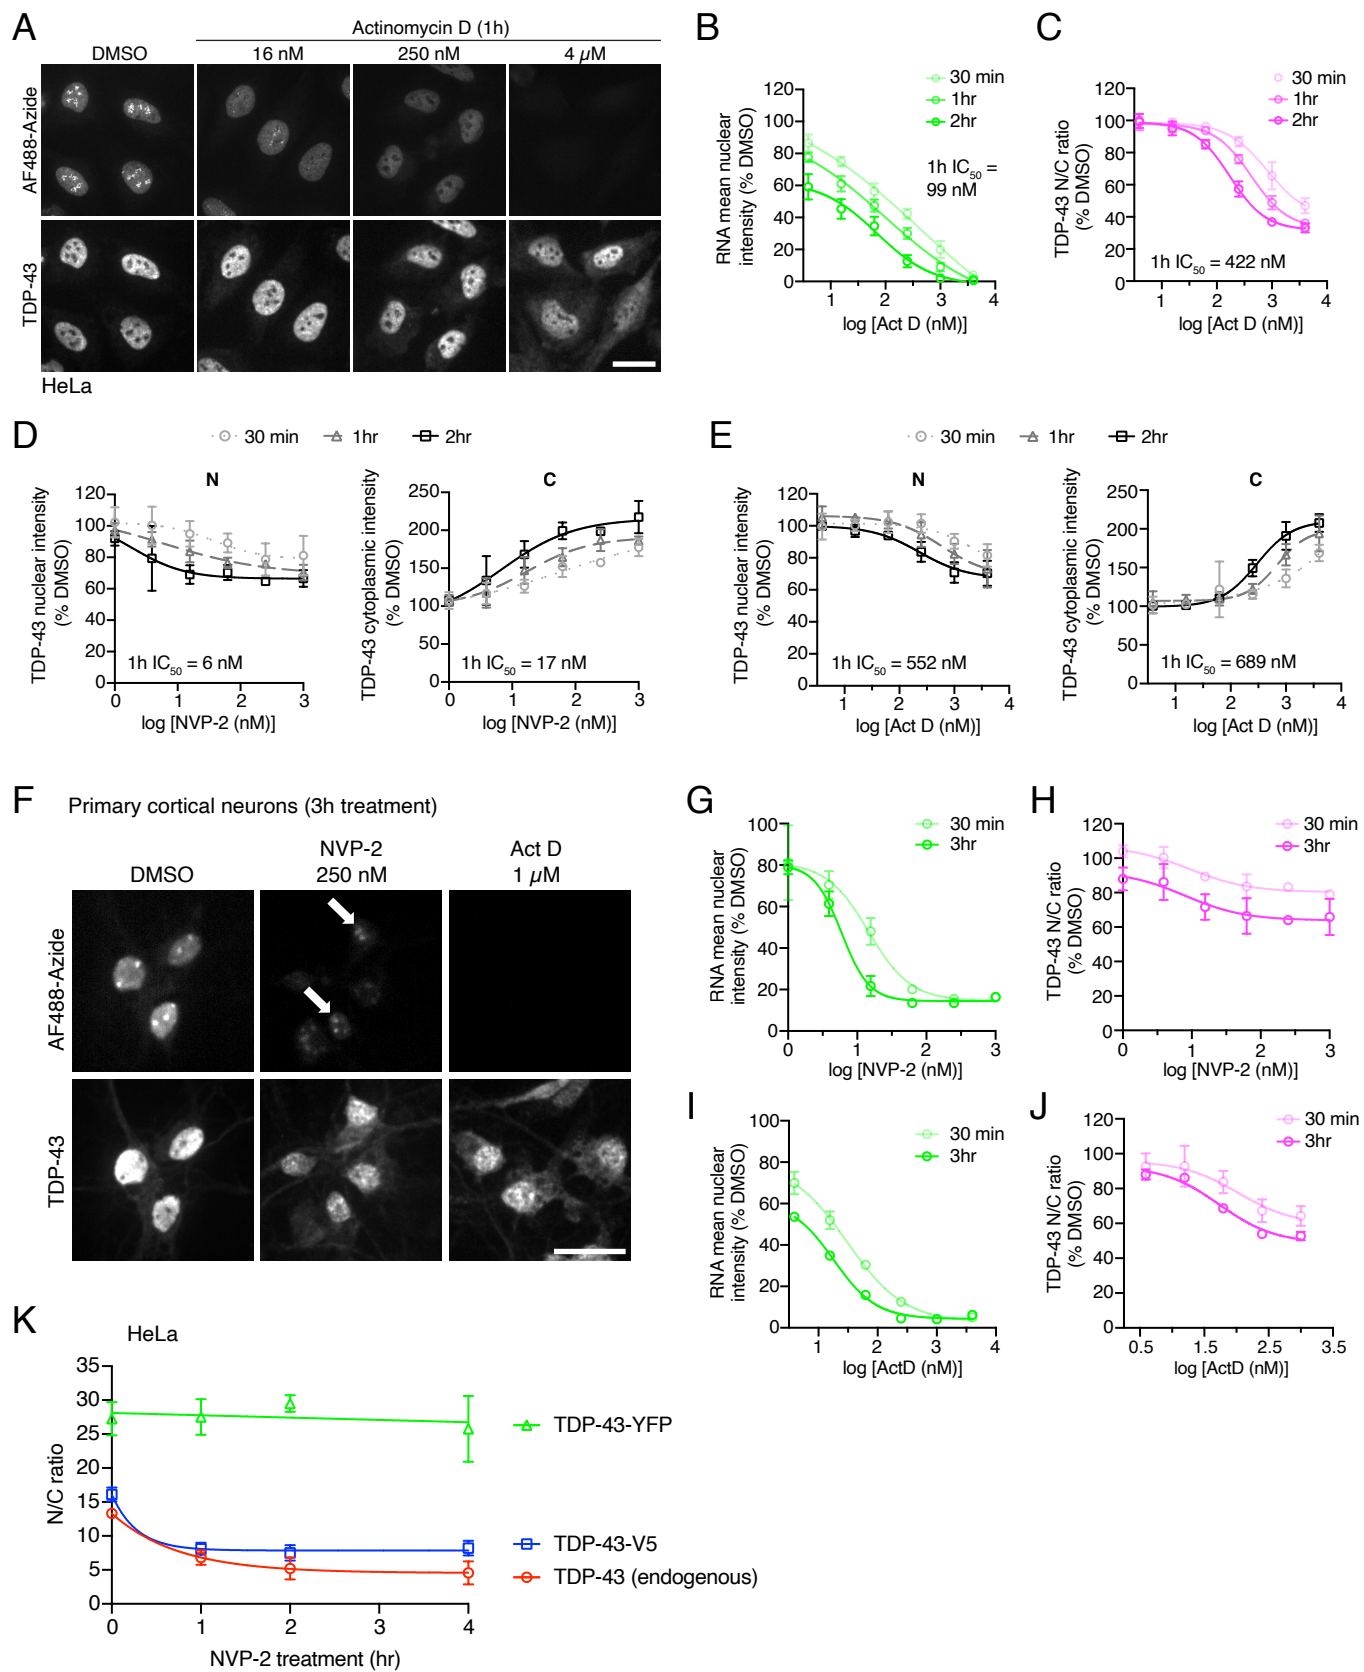



## Supplemental figure 2

A

N/C ratio (% time 0)

|               | 30 min NVP-2 | 6 h NVP-2          |
|---------------|--------------|--------------------|
| hnRNPC        | 109.7        | 184.5              |
| Y14           | 101.8        | U2AF65 116.8       |
| hnRNPM        | 101.7        | hnRNPM 115.9       |
| U2AF65        | 99.9         | sc35 113.7         |
| DDX19B        | 99.0         | DDX19B 112.8       |
| DHX15         | 98.5         | DHX15 103.6        |
| MATR3         | 98.5         | PABPN1 100.6       |
| hnRNPA2/B1    | 94.8         | Y14 99.0           |
| U170K         | 94.8         | MATR3 92.8         |
| sc35          | 94.1         | AlyREF 83.0        |
| hnRNPA1       | 94.1         | DEK 82.5           |
| AlyREF        | 93.3         | PCBP1 77.9         |
| PABPN1        | 92.8         | FUS 72.6           |
| DEK           | 89.3         | UAP56 68.4         |
| hnRNPF        | 88.7         | hnRNPK 68.0        |
| FUS           | 87.9         | hnRNPF 67.8        |
| UAP56         | 87.0         | FMRP 66.8          |
| FMRP          | 86.8         | U170K 63.2         |
| hnRNPK        | 82.9         | hnRNPA1 45.8       |
| PCBP1         | 76.1         | NXF1 37.4          |
| NXF1          | 73.7         | <b>TDP-43 34.9</b> |
| <b>TDP-43</b> | <b>63.5</b>  | hnRNPA2/B1 29.4    |
| HuR           | 63.5         | HuR 23.5           |

B

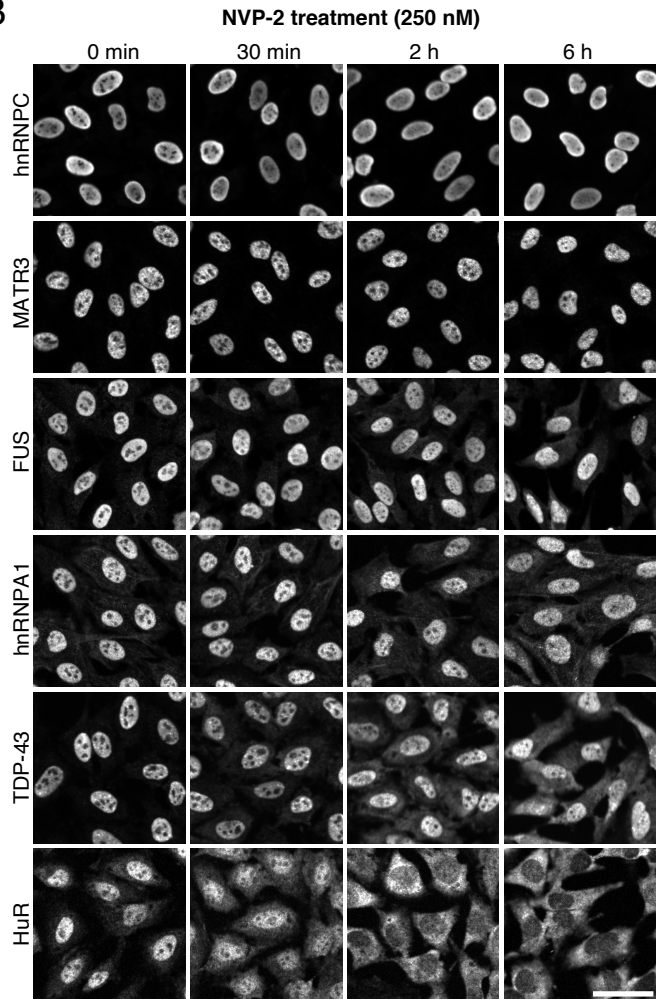

## Figure 2

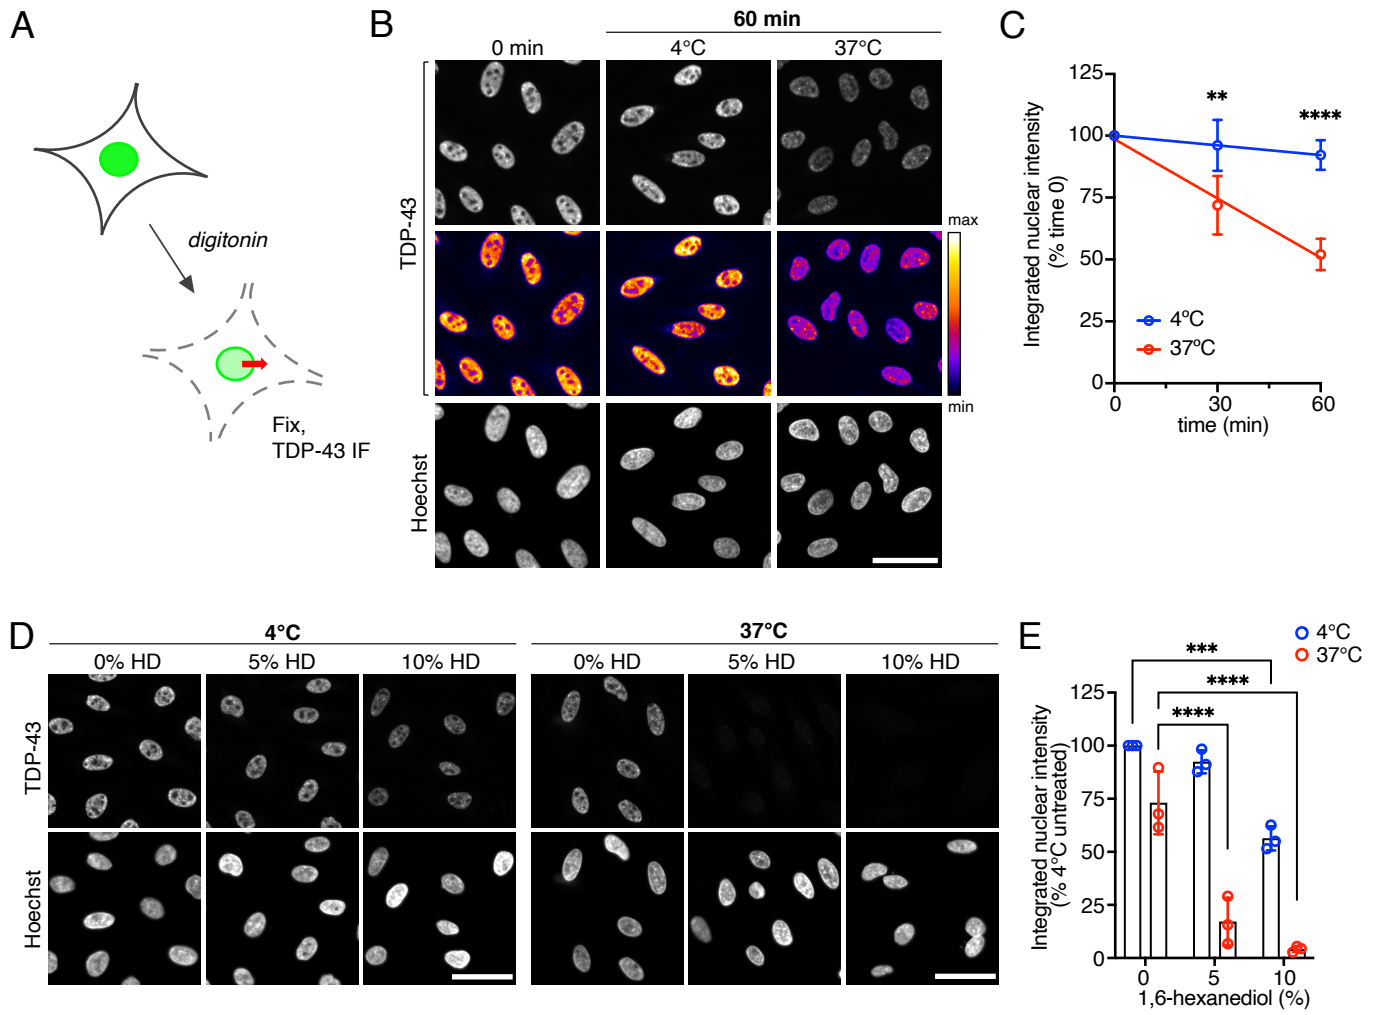

# Supplemental figure 3

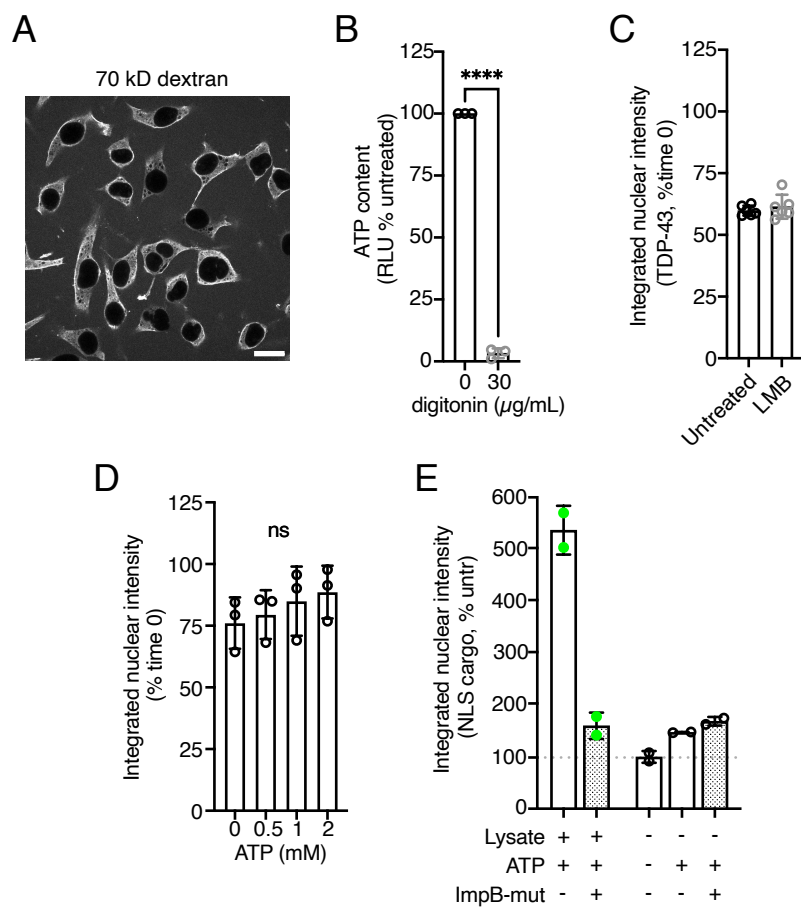

# Figure 3

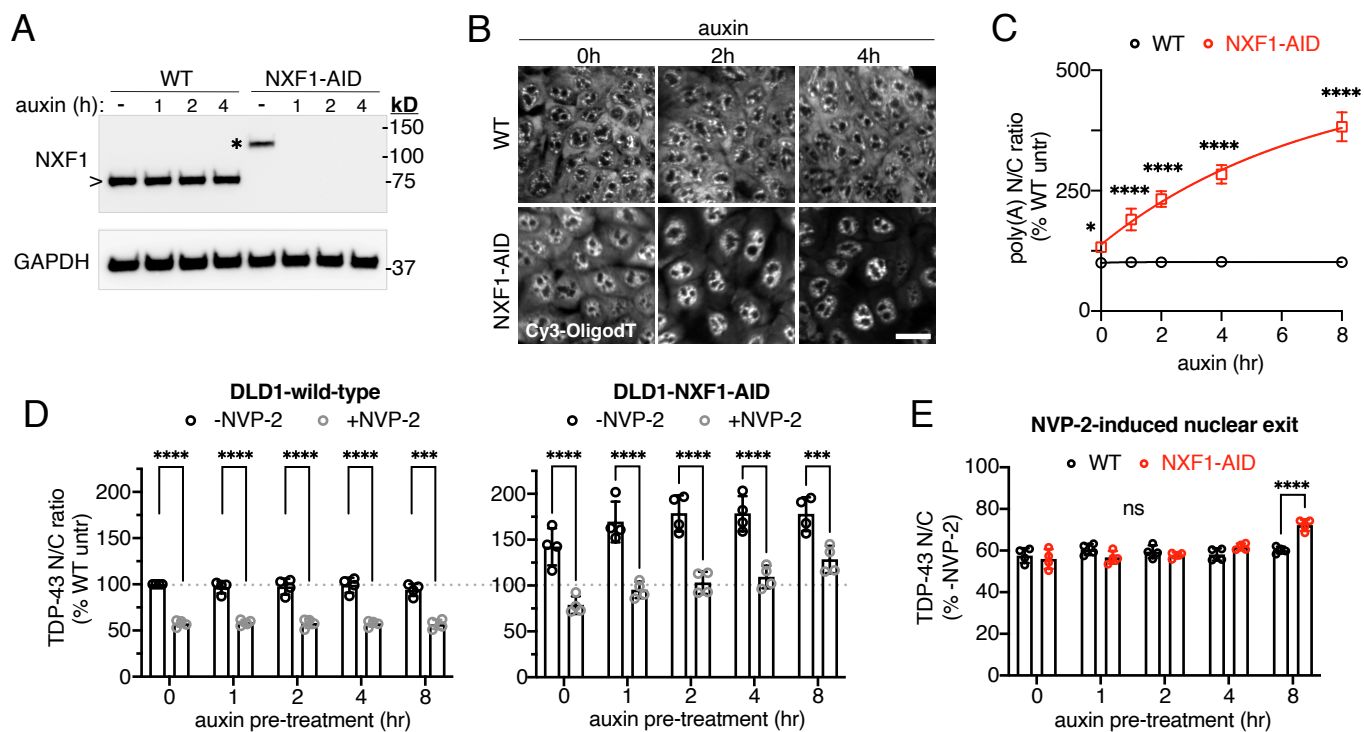

# Figure 4

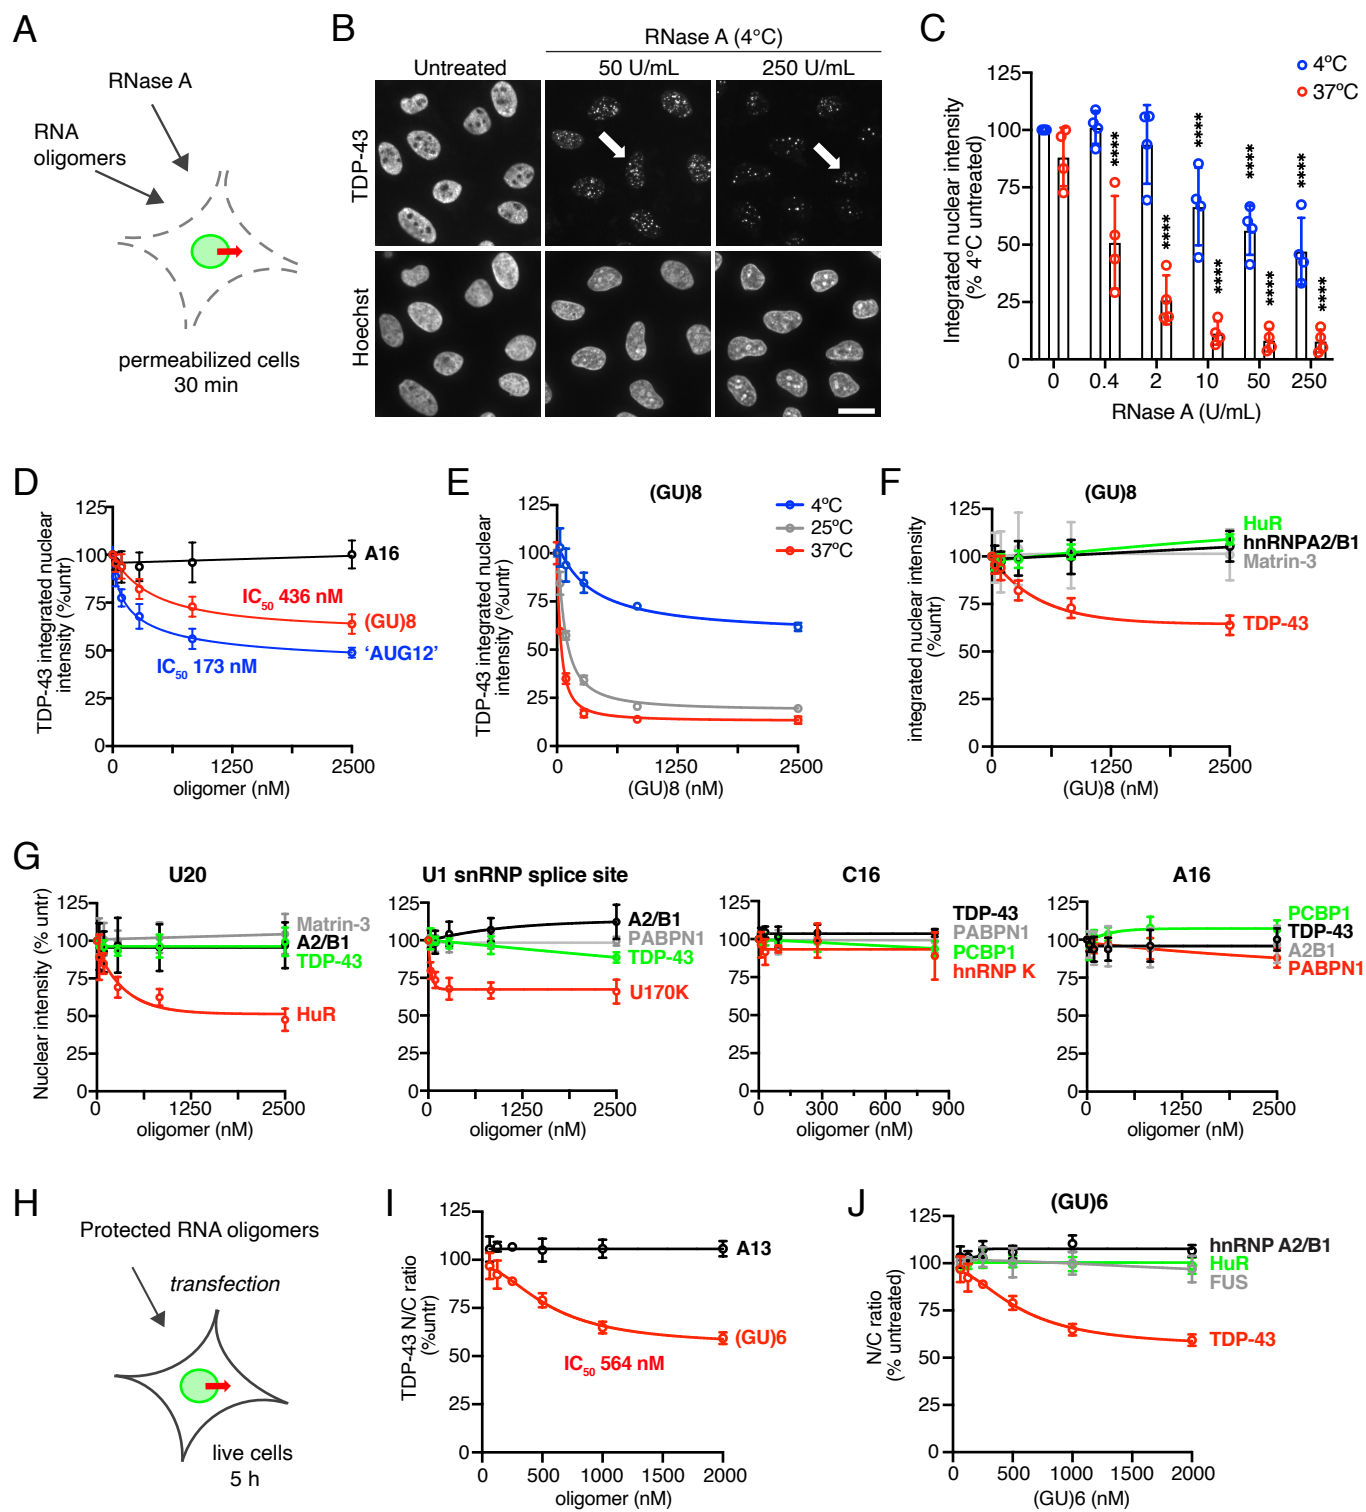

## Supplemental figure 4

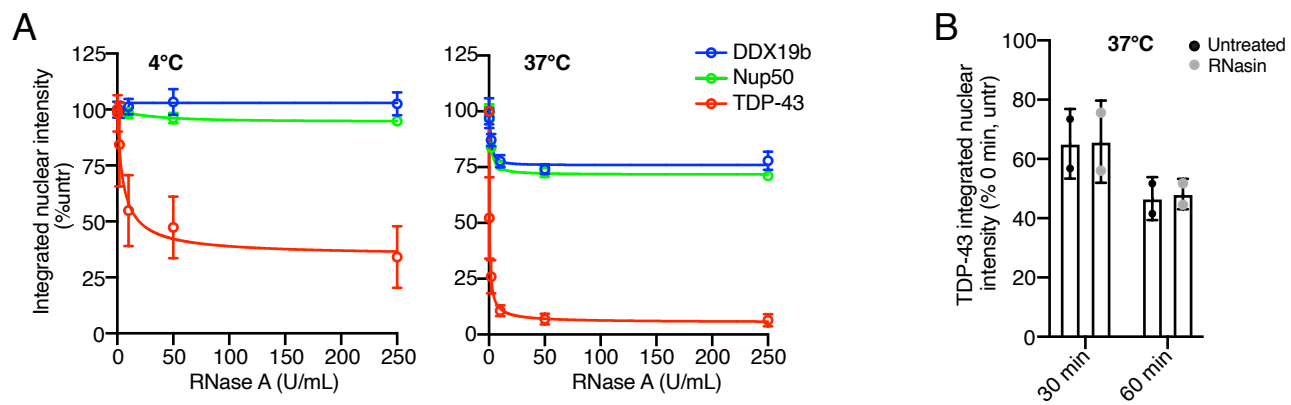

## Figure 5

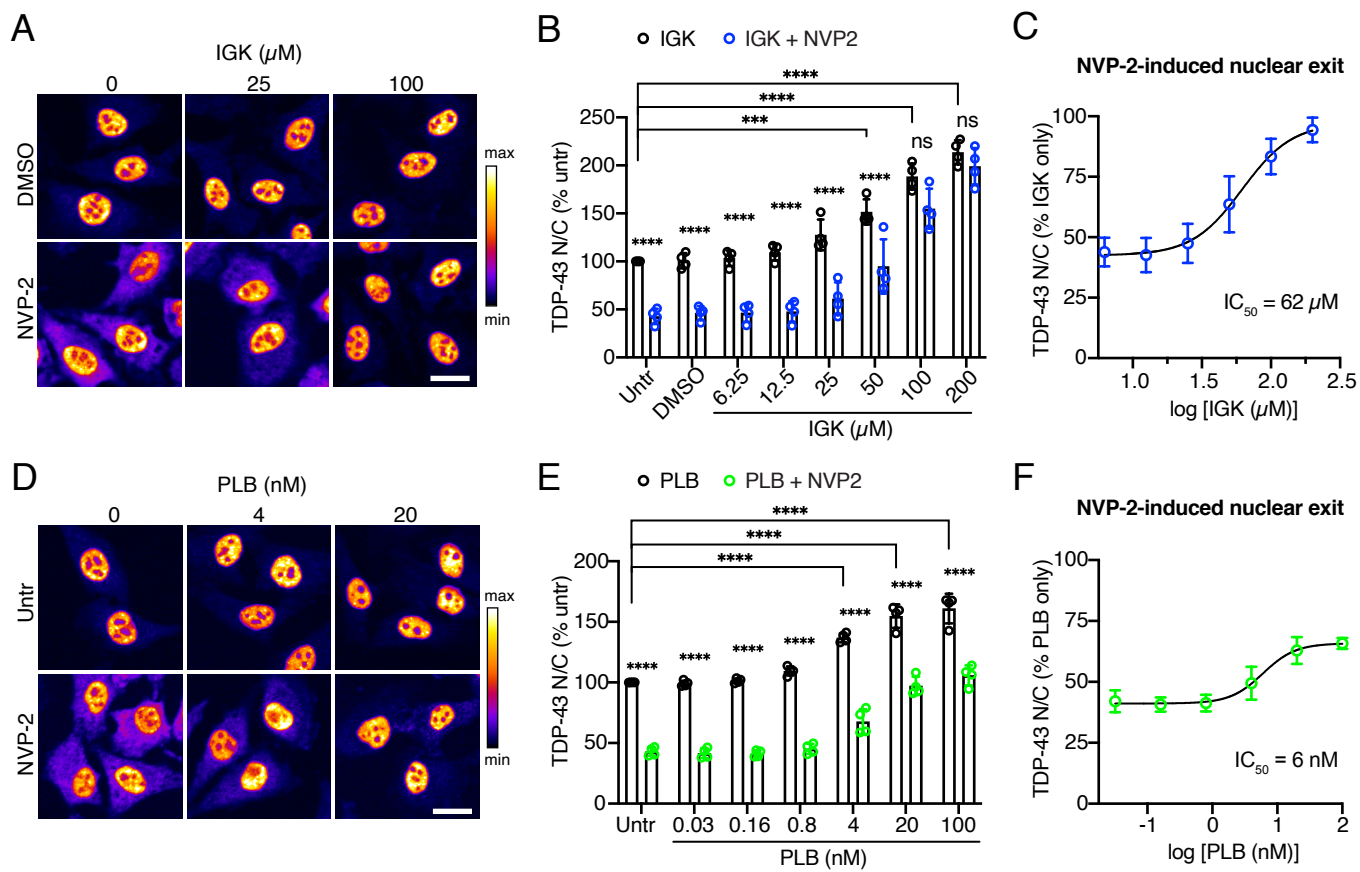

## Supplemental figure 5

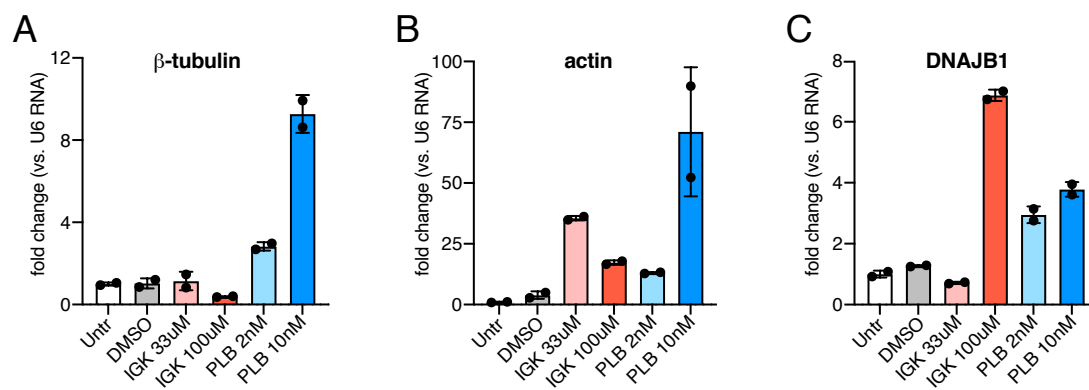



## Figure 6

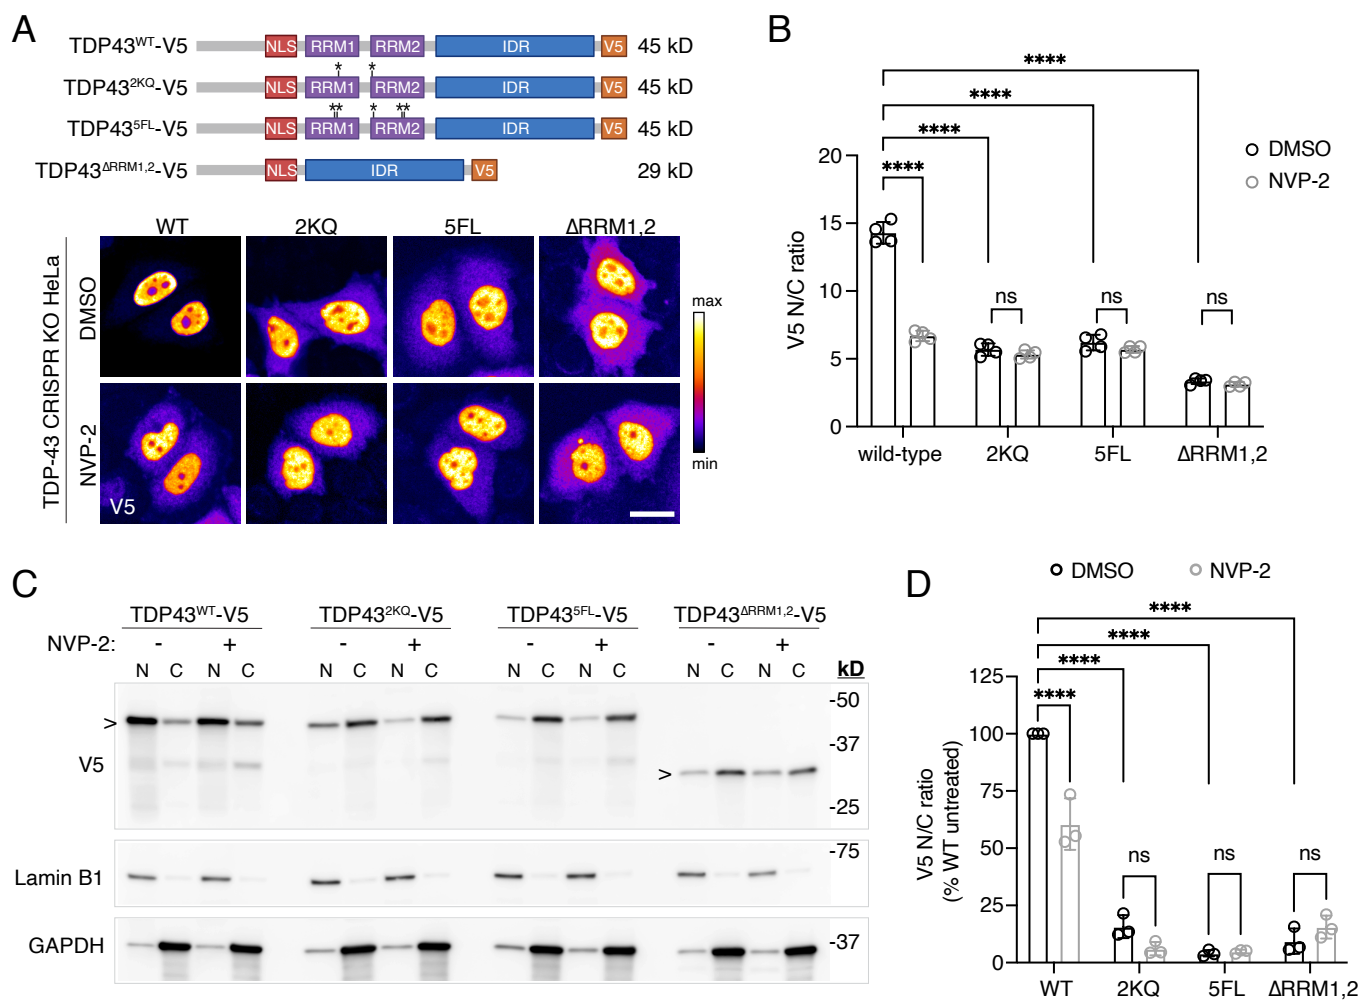

## Supplemental figure 6

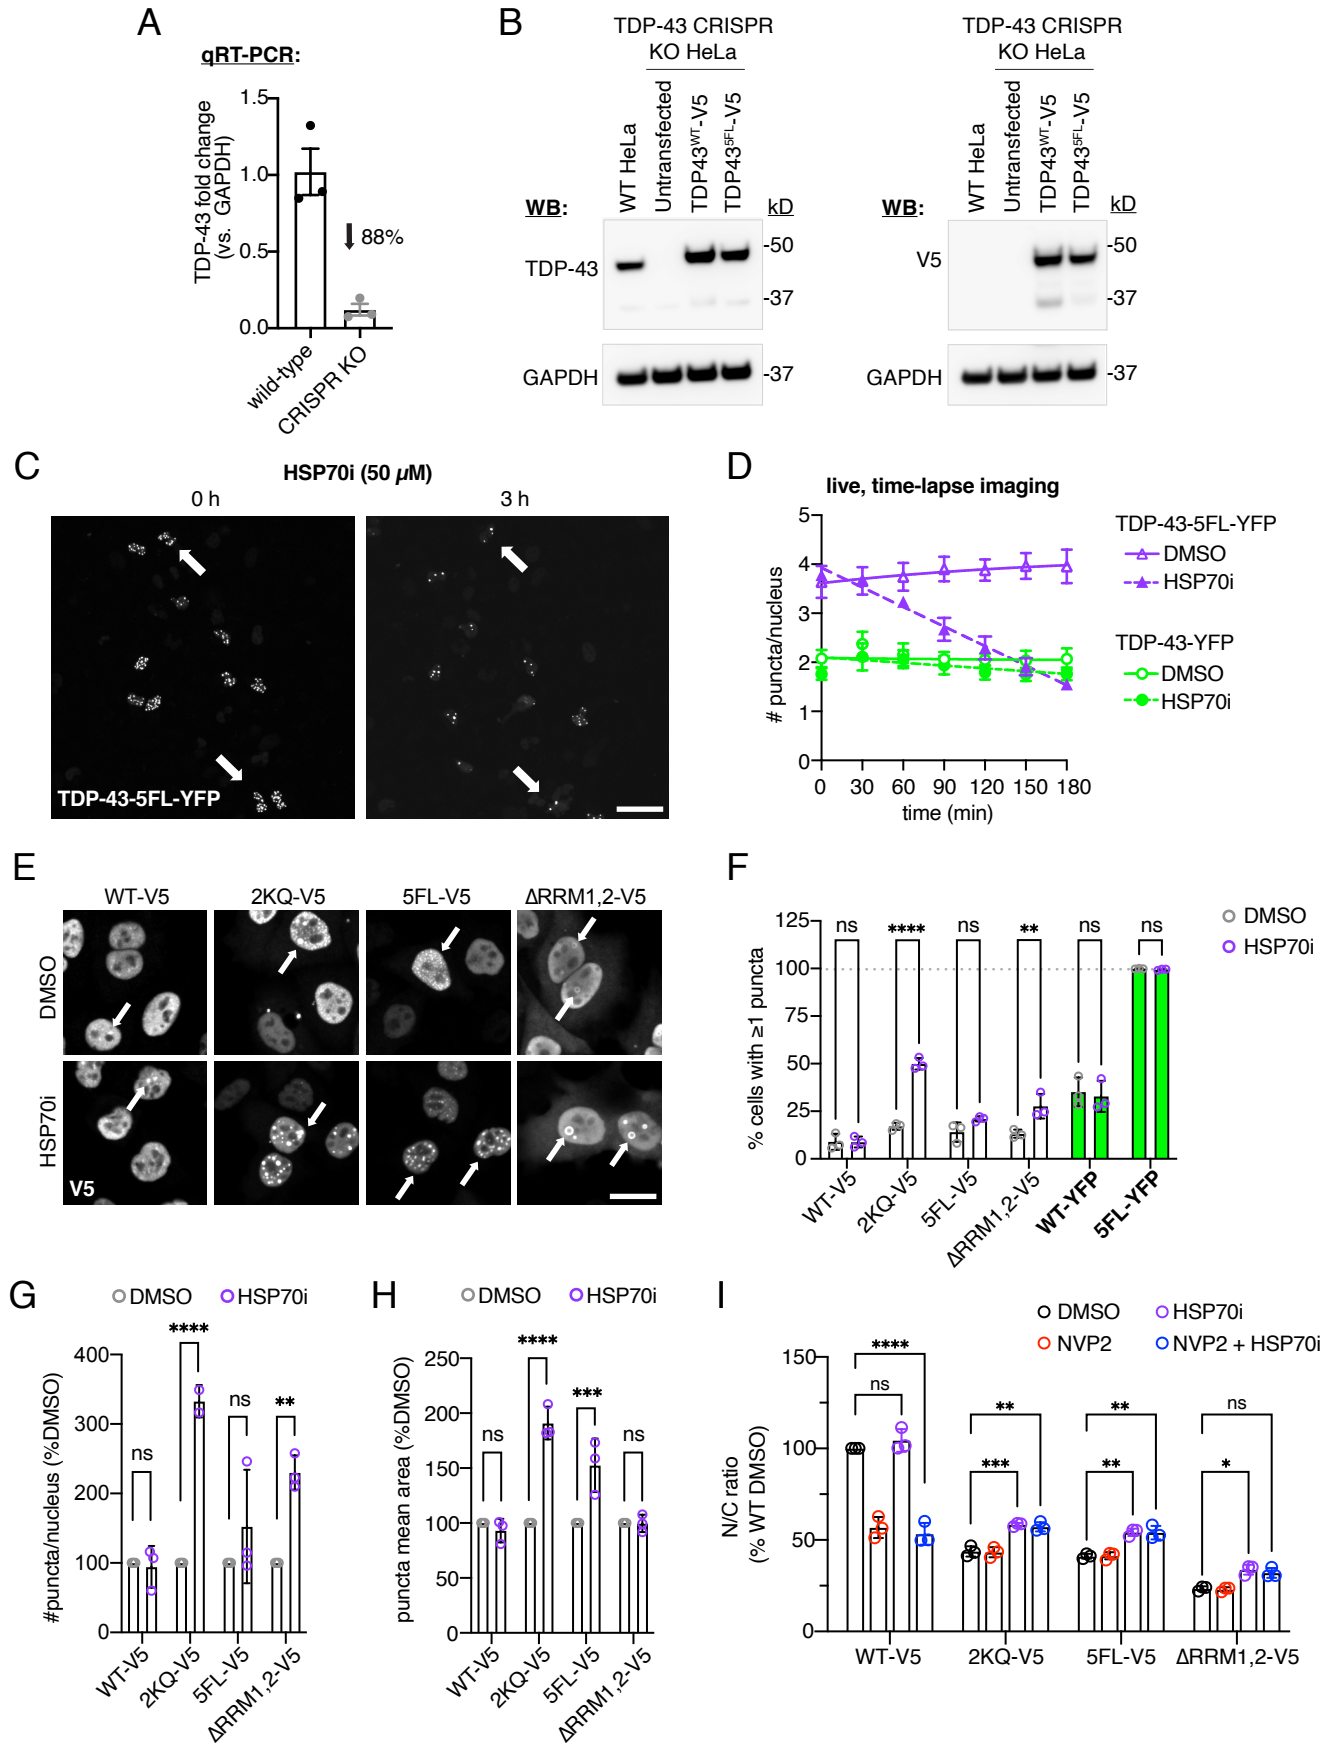

## Figure 7

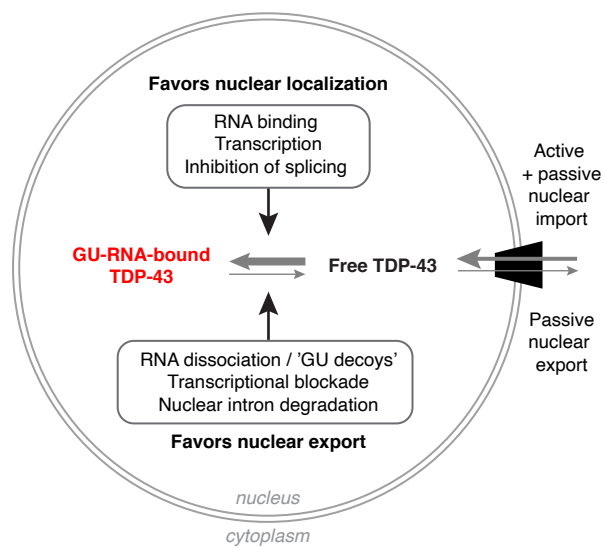

Source: http://biorxiv.org/content/10.1101/2021.08.24.457459v1.full.pdf
